# Supplementary material for: Evidence of zinc superoxide formation in the gas phase: Comparisons in behaviour between ligated Zn(I/II) and Cu(I/II) with regard to the attachment of O2 or H2O
Source: Royal Society of Chemistry journal article supplement (doi:10.1039/c1dt10769k), 2011-01-01
Supplement: c1dt10769k.pdf [file c1dt10769k.pdf]

## SUPPORTING INFORMATION

### **Evidence of zinc superoxide formation in the gas phase: Comparisons in behaviour between ligated Zn(I/II) and Cu(I/II) with regard to the attachment of O<sub>2</sub> or H<sub>2</sub>O.**

Hazel Cox<sup>a\*</sup>, Caroline Norris<sup>a</sup>, Guohua Wu<sup>b</sup>, Jingang Guan<sup>a</sup>, Stephen Hessey<sup>b</sup> and Anthony J. Stace<sup>b\*</sup>

<sup>a</sup>*Department of Chemistry and Biochemistry, University of Sussex, Falmer, Brighton BN1 9QJ, UK.*

<sup>b</sup>*Department of Physical Chemistry, School of Chemistry, The University of Nottingham, University Park, Nottingham NG7 2RD, UK.*

#### TABLE OF CONTENTS

Table S1: Total energies and geometric data for [Zn(pyridine)<sub>n</sub>]<sup>+2+</sup> and [Cu(pyridine)<sub>n</sub>]<sup>+</sup>

Figure S1: Optimised geometries for [Zn(pyridine)<sub>n</sub>]<sup>+2+</sup> and [Cu(pyridine)<sub>n</sub>]<sup>+</sup>

Table S2: NPA analysis fo [Zn(pyridine)<sub>n</sub>]<sup>+2+</sup> and [Cu(pyridine)<sub>n</sub>]<sup>+</sup>

Table S3: Total energies and geometric data for [Zn(pyridine)<sub>n</sub> O<sub>2</sub>]<sup>+2+</sup> and [Cu(pyridine)<sub>n</sub> O<sub>2</sub>]<sup>+</sup> complexes.

Table S4: Total energies and geometric data for [Zn(pyridine)<sub>n</sub> H<sub>2</sub>O]<sup>+2+</sup> and [Cu(pyridine)<sub>n</sub> H<sub>2</sub>O]<sup>+</sup> complexes

Section 5: Cartesian coordinates and thermochemistry for minima.

- Zn<sup>+</sup>- complexes: pages 9 - 21
- Zn<sup>2+</sup>- complexes: Pages 22 – 36
- Cu<sup>+</sup>-complexes: Pages 37 -49.

**Table S1:** Selected geometric parameters and electronic data for  $[\text{Zn}(\text{pyridine})_n]^{+/2+}$  complexes and  $[\text{Cu}(\text{pyridine})_n]^+$  complexes. Bond length/bond angle degeneracy is given in parentheses. Approximate symmetries are indicated by ~.. \* indicates the calculation was run using Int=Ultrafine (value shown is using the standard grid).

| Complex                               | sym             | state          | E/au        | ZPE /au | Metal-N / Å      | N-Metal-N / °        |
|---------------------------------------|-----------------|----------------|-------------|---------|------------------|----------------------|
| $[\text{Zn}(\text{pyridine})]^+$      | $\text{C}_{2v}$ | $^2\text{A}_1$ | -2027.2962  | 0.0899  | 2.059            |                      |
| $[\text{Zn}(\text{pyridine})_2]^+$    | $\text{C}_2$    | $^2\text{A}$   | -2275.6609  | 0.1802  | 2.127 (2)        | 101.2                |
|                                       | $\text{C}_s$    | $^2\text{A}'$  | -2275.6601  | 0.1801  | 2.125, 2.135     | 100.7                |
| $[\text{Zn}(\text{pyridine})_3]^+$    | $\text{C}_3$    | $^2\text{A}$   | -2524.0114* | 0.2690  | 2.160 (3)        | 98.0 (3)             |
| $[\text{Zn}(\text{pyridine})_4]^+$    | $\text{D}_{2d}$ | $^2\text{B}_2$ | -2772.3672  | 0.3572  | 2.029 (4)        | 110.4 (4), 107.6 (2) |
| $[\text{Zn}(\text{pyridine})]^{2+}$   | $\text{C}_{2v}$ | $^1\text{A}_1$ | -2026.8227  | 0.0895  | 1.910            |                      |
|                                       | ~ $\eta$ -py    | $^1\text{A}$   | -2026.7647  | 0.0889  | 2.279            |                      |
| $[\text{Zn}(\text{pyridine})_2]^{2+}$ | $\text{D}_{2d}$ | $^1\text{A}_1$ | -2275.3190  | 0.1812  | 1.896 (2)        | 180.0                |
| $[\text{Zn}(\text{pyridine})_3]^{2+}$ | $\text{C}_3$    | $^1\text{A}$   | -2523.7310* | 0.2715  | 1.985 (3)        | 120.0 (3)            |
|                                       | $\text{C}_s$    | $^1\text{A}'$  | -2523.7279  | 0.2722  | 1.989 (2), 1.992 | 125.5, 117.0 (2)     |
| $[\text{Zn}(\text{pyridine})_4]^{2+}$ | $\text{D}_{2d}$ | $^1\text{A}_1$ | -2772.1168  | 0.3628  | 2.048 (4)        | 110.9 (4), 106.6 (2) |
| $[\text{Cu}(\text{pyridine})]^+$      | $\text{C}_{2v}$ | $^1\text{A}_1$ | -1888.4856  | 0.0904  | 1.906            |                      |
|                                       | ~ $\eta$ -py    | $^1\text{A}$   | -1888.4505  | 0.0890  | 2.690            |                      |
| $[\text{Cu}(\text{pyridine})_2]^+$    | $\text{D}_{2d}$ | $^1\text{A}_1$ | -2136.8930  | 0.1812  | 1.902 (2)        | 180.0                |
| $[\text{Cu}(\text{pyridine})_3]^+$    | ~ $\text{C}_2$  | $^1\text{A}$   | -2385.2349* | 0.2698  | 1.985 (2), 2.068 | 136.2, 111.9 (2)     |
| $[\text{Cu}(\text{pyridine})_4]^+$    | $\text{D}_{2d}$ | $^1\text{A}_1$ | -2633.5750  | 0.3608  | 2.072 (4)        | 111.0 (4) 106.5 (2)  |

Figure S1

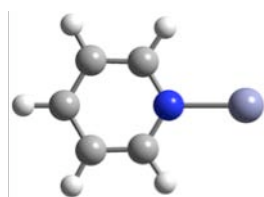

Zn(I)-1:  $C_{2v}$

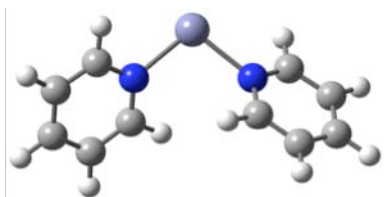

Zn(I)-2a:  $C_2$

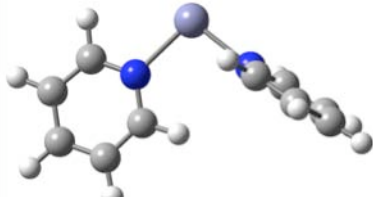

Zn(I)-2b:  $C_s$

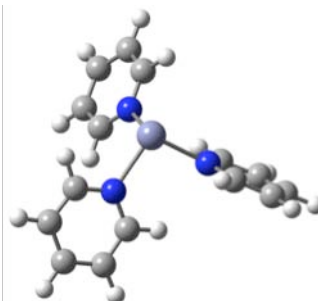

Zn(I)-3:  $C_3$

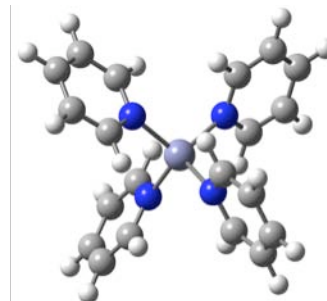

Zn(I)-4:  $D_{2d}$

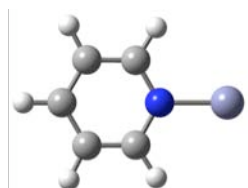

Zn(II)-1a:  $C_{2v}$

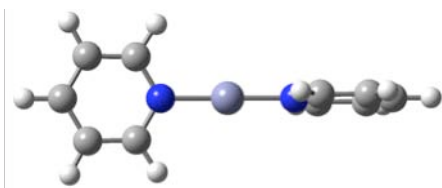

Zn(II)-2:  $D_{2d}$

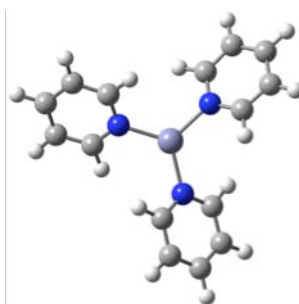

Zn(II)-3a:  $C_3$

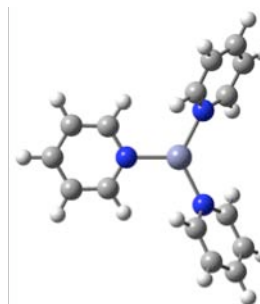

Zn(II)-3b:  $C_s$

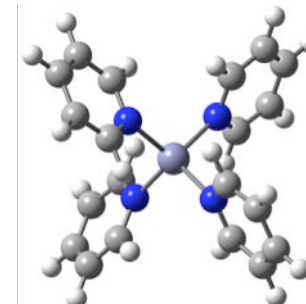

Zn(II)-4:  $D_{2d}$

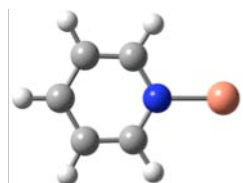

Cu(I)-1a:  $C_{2v}$

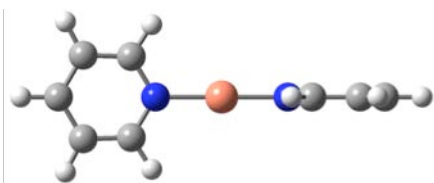

Cu(I)-2:  $D_{2d}$

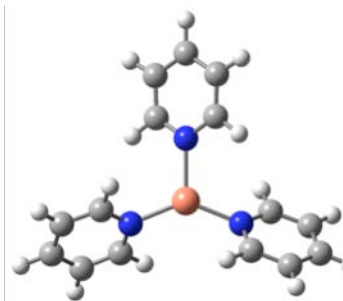

Cu(I)-3:  $\sim C_2$  (2 views)

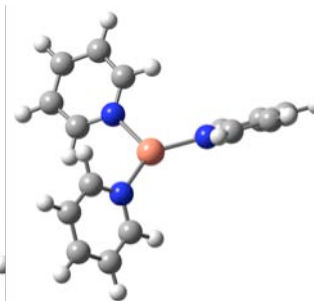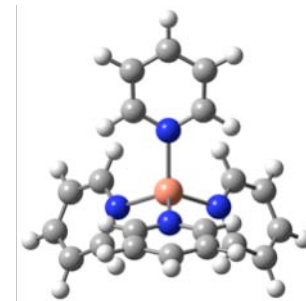

Cu(I)-4:  $D_{2d}$  (alternative view)

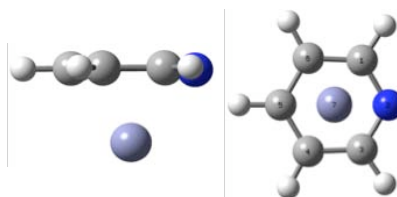

Zn(II)-1b:  $\sim [\eta^5]$ -pyridine

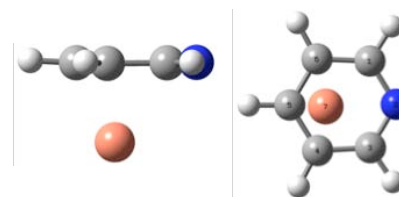

Cu(I)-1b:  $\sim [\eta^5]$ -pyridine

**Table S2:** Natural bond order analysis of charge transfer in the lower energy structural isomer of the  $[\text{Zn}(\text{pyridine})_n]^{+/2+}$  and  $[\text{Cu}(\text{pyridine})_n]^+$  complexes (see Table 2). The charge on N in an isolated pyridine molecule is  $-0.452e$ .

| Complex                               | Atomic Charge |           | Zn or Cu natural population |      |      |      |
|---------------------------------------|---------------|-----------|-----------------------------|------|------|------|
|                                       | Charge Metal  | Charge N* | 4s                          | 3d   | 4p   | 4d   |
| $[\text{Zn}(\text{pyridine})]^+$      | 0.83          | -0.64     | 1.12                        | 9.98 | 0.07 |      |
| $[\text{Zn}(\text{pyridine})_2]^+$    | 0.77          | -0.62     | 1.06                        | 9.98 | 0.19 |      |
| $[\text{Zn}(\text{pyridine})_3]^+$    | 0.73          | -0.59     | 0.92                        | 9.98 | 0.36 | 0.01 |
| $[\text{Zn}(\text{pyridine})_4]^+$    | 1.30          | -0.65     | 0.35                        | 9.96 | 0.38 | 0.02 |
| $[\text{Zn}(\text{pyridine})]^{2+}$   | 1.63          | -0.72     | 0.37                        | 9.98 | 0.02 |      |
| $[\text{Zn}(\text{pyridine})_2]^{2+}$ | 1.47          | -0.71     | 0.50                        | 9.94 | 0.08 |      |
| $[\text{Zn}(\text{pyridine})_3]^{2+}$ | 1.40          | -0.67     | 0.41                        | 9.96 | 0.23 | 0.01 |
| $[\text{Zn}(\text{pyridine})_4]^{2+}$ | 1.31          | -0.62     | 0.35                        | 9.96 | 0.35 | 0.01 |
| $[\text{Cu}(\text{pyridine})]^+$      | 0.87          | -0.64     | 0.25                        | 9.87 | 0.01 |      |
| $[\text{Cu}(\text{pyridine})_2]^+$    | 0.68          | -0.58     | 0.52                        | 9.75 | 0.05 |      |
| $[\text{Cu}(\text{pyridine})_3]^+$    | 0.70          | -0.57     | 0.33                        | 9.78 | 0.18 | 0.01 |
| $[\text{Cu}(\text{pyridine})_4]^+$    | 0.67          | -0.54     | 0.23                        | 9.76 | 0.32 | 0.02 |

\*Average N charge

**Table S3:** Selected geometric parameters and electronic data for  $[\text{Zn}(\text{pyridine})_n\text{O}_2]^{+/2+}$  complexes and  $[\text{Cu}(\text{pyridine})_n\text{O}_2]^+$  complexes. Bond length/bond angle degeneracy is given in parentheses. Approximate symmetries are indicated by ~. \* indicates the calculation was run using Int=Ultrafine (value shown is using the standard grid), and + indicates that the calculation was performed using the 6-311++G(2df,p) basis set. The energy given in parenthesis is using the standard grid and basis set (to ensure consistency in the binding energy calculations).

| Complex                                           | sym                    | state          | E/au                         | ZPE /au | Metal-N / Å            | N-Metal-N / °       | Metal-O / Å  | N-Metal-O / °<br>(coordinating O) |
|---------------------------------------------------|------------------------|----------------|------------------------------|---------|------------------------|---------------------|--------------|-----------------------------------|
| $[\text{ZnO}_2]^+$                                | $\eta^1\text{-C}_s$    | $^2\text{A}''$ | -1929.2653                   | 0.0045  |                        |                     | 2.209, 3.061 |                                   |
| $[\text{Zn}(\text{pyridine})(\text{O}_2)]^+$      | $\eta^2\text{-C}_{2v}$ | $^2\text{A}_2$ | -2177.6784                   | 0.0953  | 1.910                  |                     | 1.934 (2)    | 159.2 (2)                         |
| $[\text{Zn}(\text{pyridine})_2(\text{O}_2)]^+$    | $\eta^2\text{-C}_1$    | $^2\text{A}$   | -2426.0727                   | 0.1872  | 1.982 (2)              | 139.6               | 2.027 (2)    | 109.0 (4)                         |
| $[\text{Zn}(\text{pyridine})_3(\text{O}_2)]^+$    | $\eta^1\text{-C}_1$    | $^2\text{A}$   | -2674.4336                   | 0.2767  | 2.074, 2.060,<br>2.057 | 106.0, 107.4, 111.5 | 1.950, 2.484 | 108.7, 109.1, 114.1               |
|                                                   | $\eta^1\text{-C}_1$    | $^2\text{A}$   | -2674.4334                   | 0.2767  | 2.072, 2.058,<br>2.048 | 106.9, 109.1, 112.9 | 1.952, 2.471 | 105.8, 108.9, 113.3               |
| $[\text{ZnO}_2]^{2+}$                             | $\eta^1\text{-C}_s$    | $^3\text{A}''$ | -1928.6730                   | 0.0047  |                        |                     | 2.058, 3.028 |                                   |
| $[\text{Zn}(\text{pyridine})(\text{O}_2)]^{2+}$   | $\eta^1\text{-C}_s$    | $^3\text{A}''$ | -2177.2189                   | 0.0953  | 1.893                  |                     | 2.008, 3.002 | 176.4                             |
| $[\text{Zn}(\text{pyridine})_2(\text{O}_2)]^{2+}$ | $\eta^1\text{-C}_1$    | $^3\text{A}$   | -2425.6840 *                 | 0.1858  | 1.911, 1.914           | 166.3               | 2.362, 3.317 | 95.9, 97.8                        |
| $[\text{Zn}(\text{pyridine})_3(\text{O}_2)]^{2+}$ | $\eta^1\text{-C}_1$    | $^3\text{A}$   | -2674.1376 +<br>(-2674.0944) | 0.2770  | 1.987, 1.984, 1.986    | 119.5 (2), 119.8    | 2.464, 3.328 | 93.9 (2), 91.6                    |
| $[\text{CuO}_2]^+$                                | $\eta^1\text{-C}_s$    | $^3\text{A}''$ | -1790.4469                   | 0.0046  | N/a                    |                     | 1.947, 2.903 | n/a                               |
| $[\text{Cu}(\text{pyridine})(\text{O}_2)]^+$      | $\eta^1\text{-C}_s$    | $^3\text{A}''$ | -2038.8682 *                 | 0.0955  | 1.908                  |                     | 1.863, 2.822 | 177.5                             |
| $[\text{Cu}(\text{pyridine})_2(\text{O}_2)]^+$    | $\eta^1\text{-C}_1$    | $^3\text{A}$   | -2287.2515 *                 | 0.1855  | 1.924 (2)              | 169.9               | 2.293, 3.130 | 93.7, 96.5                        |
| $[\text{Cu}(\text{pyridine})_3(\text{O}_2)]^+$    | $\eta^1\text{-C}_1$    | $^3\text{A}$   | -2535.6407 +<br>(-2535.5995) | 0.2753  | 2.027, 2.044, 2.038    | 120.9, 119.9, 113.7 | 2.091, 2.857 | 93.9, 99.8, 100.5                 |

**Table S4:** Selected geometric parameters and electronic data for  $[\text{Zn}(\text{pyridine})_n\text{H}_2\text{O}]^{+/2+}$  complexes and  $[\text{Cu}(\text{pyridine})_n\text{H}_2\text{O}]^+$  complexes.

Bond length/bond angle degeneracy is given in parentheses. Approximate symmetries are indicated by ~. \* indicates the calculation was run

using Int=Ultrafine (value shown is using the standard grid), and + indicates that the calculation was performed using the 6-311++G(2df,p) basis set. The energy given in parenthesis is using the standard grid and basis set (to ensure consistency in the binding energy calculations).

| Complex                                                    | sym             | state                       | E/au                        | ZPE /au | Metal-N / Å         | N-Metal-N / °       | Metal-O / Å | N-Metal-O / °      |
|------------------------------------------------------------|-----------------|-----------------------------|-----------------------------|---------|---------------------|---------------------|-------------|--------------------|
| [Zn H <sub>2</sub> O] <sup>+</sup>                         | C <sub>2v</sub> | <sup>2</sup> A <sub>1</sub> | -1855.3911                  | 0.0238  |                     |                     | 2.070       |                    |
| [Zn(pyridine) H <sub>2</sub> O] <sup>+</sup>               | C <sub>1</sub>  | <sup>2</sup> A              | -2103.7706                  | 0.1145  | 2.086               |                     | 2.217       | 95.3               |
| [Zn(pyridine) <sub>2</sub> H <sub>2</sub> O] <sup>+</sup>  | C <sub>1</sub>  | <sup>2</sup> A              | -2352.1267                  | 0.2047  | 2.138, 2.154        | 100.8               | 2.292       | 92.0, 88.6         |
| [Zn(pyridine) <sub>3</sub> H <sub>2</sub> O] <sup>+</sup>  | C <sub>1</sub>  | <sup>2</sup> A              | -2600.4756                  | 0.2928  | 1.991, 1.989, 1.983 | 118.0, 117.7, 116.4 | 2.202       | 105.9, 97.5, 94.8  |
| [Zn H <sub>2</sub> O] <sup>2+</sup>                        | C <sub>2v</sub> | <sup>1</sup> A <sub>1</sub> | -1854.8438                  | 0.0239  |                     |                     | 1.876       |                    |
| [Zn(pyridine) H <sub>2</sub> O] <sup>2+</sup>              | C <sub>2v</sub> | <sup>1</sup> A <sub>1</sub> | -2103.3795                  | 0.1152  | 1.884               |                     | 1.889       | 180.0              |
| [Zn(pyridine) <sub>2</sub> H <sub>2</sub> O] <sup>2+</sup> | C <sub>1</sub>  | <sup>1</sup> A              | -2351.8174                  | 0.2068  | 1.944 (2)           | 144.4               | 2.052       | 107.8 (2)          |
| [Zn(pyridine) <sub>3</sub> H <sub>2</sub> O] <sup>2+</sup> | C <sub>1</sub>  | <sup>1</sup> A              | -2600.2531+<br>(-2600.2165) | 0.2965  | 2.011, 2.012, 2.009 | 115.4, 114.3, 117.4 | 2.122       | 102.1, 99.2, 105.1 |
| [Cu H <sub>2</sub> O] <sup>+</sup>                         | C <sub>2v</sub> | <sup>1</sup> A <sub>1</sub> | -1716.5763                  | 0.0241  |                     |                     | 1.945       |                    |
| [Cu(pyridine) H <sub>2</sub> O] <sup>+</sup>               | C <sub>1</sub>  | <sup>1</sup> A              | -1964.9911*                 | 0.1153  | 1.891               |                     | 1.916       | 178.6              |
| [Cu(pyridine) <sub>2</sub> H <sub>2</sub> O] <sup>+</sup>  | C <sub>1</sub>  | <sup>1</sup> A              | -2213.3521*                 | 0.2048  | 1.921 (2)           | 169.0               | 2.443       | 95.5 (2)           |
| [Cu(pyridine) <sub>3</sub> H <sub>2</sub> O] <sup>+</sup>  | C <sub>1</sub>  | <sup>1</sup> A              | -2461.6922*                 | 0.2935  | 1.996, 2.024, 2.053 | 111.9, 117.6, 127.6 | 2.434       | 92.4, 96.2, 97.8   |

## Section 5: Cartesian coordinates and thermochemistry for all confirmed minima.

Geometries were confirmed as minima by frequency analysis, and identified by an absence of imaginary vibrational modes. To ensure global minima were located for each value of  $n$ , several starting structures were investigated that involved different relative orientations of the pyridine rings and binding modes of O<sub>2</sub>. For example, for [Zn(pyridine)<sub>3</sub>]<sup>2+</sup> the following geometric structures were investigated D<sub>3h</sub>, C<sub>2v</sub> (two rings in the plane), C<sub>2v</sub> (one ring in the plane), a C<sub>s</sub> geometry derived from the tetrahedral-like D<sub>2d</sub> geometry with a pyridine removed, and planar C<sub>3</sub>. Many of these structures had imaginary modes (with or without symmetry constraints). Low frequency vibrational modes involving pyridine made it necessary on occasion to tighten the convergence criteria to eliminate imaginary modes (opt=tight and Int=UltraFine). Only the confirmed minima are listed below.

\* indicates that the calculation was performed with Int=Ultrafine.

+ indicates that M06L/6-311++G(2df,p) was used for the opt/freq calculation

When \* and/or + was necessary, the energy used in the energy calculations presented in the main text was that of a single point energy (SPE) calculation performed using the standard integration grid and the 6-311++G(d,p) basis (for consistency).

### Pyridine (singlet) – C<sub>2v</sub>

|                                              |                             |
|----------------------------------------------|-----------------------------|
| Zero-point correction=                       | 0.088144 (Hartree/Particle) |
| Thermal correction to Energy=                | 0.092471                    |
| Thermal correction to Enthalpy=              | 0.093415                    |
| Thermal correction to Gibbs Free Energy=     | 0.061374                    |
| Sum of electronic and zero-point Energies=   | -248.221825                 |
| Sum of electronic and thermal Energies=      | -248.217498                 |
| Sum of electronic and thermal Enthalpies=    | -248.216554                 |
| Sum of electronic and thermal Free Energies= | -248.248595                 |

|   |            |             |             |
|---|------------|-------------|-------------|
| N | 0.00000000 | 0.00000000  | 1.41822800  |
| C | 0.00000000 | 1.13713600  | 0.71886900  |
| C | 0.00000000 | 1.19353400  | -0.67079200 |
| C | 0.00000000 | 0.00000000  | -1.38113800 |
| C | 0.00000000 | -1.19353400 | -0.67079200 |
| C | 0.00000000 | -1.13713600 | 0.71886900  |
| H | 0.00000000 | -2.05445100 | 1.30455600  |
| H | 0.00000000 | -2.15162300 | -1.18005800 |
| H | 0.00000000 | 0.00000000  | -2.46669100 |
| H | 0.00000000 | 2.15162300  | -1.18005800 |
| H | 0.00000000 | 2.05445100  | 1.30455600  |

### **O<sub>2</sub> (triplet) – C<sub>2v</sub>**

|                                              |                             |
|----------------------------------------------|-----------------------------|
| Zero-point correction=                       | 0.003722 (Hartree/Particle) |
| Thermal correction to Energy=                | 0.006085                    |
| Thermal correction to Enthalpy=              | 0.007029                    |
| Thermal correction to Gibbs Free Energy=     | -0.016246                   |
| Sum of electronic and zero-point Energies=   | -150.347665                 |
| Sum of electronic and thermal Energies=      | -150.345302                 |
| Sum of electronic and thermal Enthalpies=    | -150.344358                 |
| Sum of electronic and thermal Free Energies= | -150.367633                 |

|   |            |            |             |
|---|------------|------------|-------------|
| O | 0.00000000 | 0.00000000 | 0.60374300  |
| O | 0.00000000 | 0.00000000 | -0.60374300 |

### **H<sub>2</sub>O (singlet) – C<sub>2v</sub>**

|                                              |                             |
|----------------------------------------------|-----------------------------|
| Zero-point correction=                       | 0.021578 (Hartree/Particle) |
| Thermal correction to Energy=                | 0.024413                    |
| Thermal correction to Enthalpy=              | 0.025357                    |
| Thermal correction to Gibbs Free Energy=     | 0.003938                    |
| Sum of electronic and zero-point Energies=   | -76.419504                  |
| Sum of electronic and thermal Energies=      | -76.416669                  |
| Sum of electronic and thermal Enthalpies=    | -76.415725                  |
| Sum of electronic and thermal Free Energies= | -76.437144                  |



|   |            |             |             |
|---|------------|-------------|-------------|
| O | 0.00000000 | 0.00000000  | 0.11819400  |
| H | 0.00000000 | 0.75616600  | -0.47277500 |
| H | 0.00000000 | -0.75616600 | -0.47277500 |

## Zn<sup>+</sup> COMPLEXES

### [Zn(pyridine)]<sup>+</sup> (doublet) – C<sub>2v</sub>

|                                              |                             |
|----------------------------------------------|-----------------------------|
| Zero-point correction=                       | 0.089884 (Hartree/Particle) |
| Thermal correction to Energy=                | 0.096144                    |
| Thermal correction to Enthalpy=              | 0.097089                    |
| Thermal correction to Gibbs Free Energy=     | 0.058073                    |
| Sum of electronic and zero-point Energies=   | -2027.206291                |
| Sum of electronic and thermal Energies=      | -2027.200030                |
| Sum of electronic and thermal Enthalpies=    | -2027.199086                |
| Sum of electronic and thermal Free Energies= | -2027.238101                |

|    |            |             |             |
|----|------------|-------------|-------------|
| N  | 0.00000000 | 0.00000000  | -0.04335400 |
| C  | 0.00000000 | 1.16406200  | -0.72296600 |
| C  | 0.00000000 | 1.19934400  | -2.10506000 |
| C  | 0.00000000 | 0.00000000  | -2.80848400 |
| C  | 0.00000000 | -1.19934400 | -2.10506000 |
| C  | 0.00000000 | -1.16406200 | -0.72296600 |
| H  | 0.00000000 | 2.07532700  | -0.13337300 |
| H  | 0.00000000 | 2.15545200  | -2.61444400 |
| H  | 0.00000000 | 0.00000000  | -3.89299100 |
| H  | 0.00000000 | -2.15545200 | -2.61444400 |
| H  | 0.00000000 | -2.07532700 | -0.13337300 |
| Zn | 0.00000000 | 0.00000000  | 2.01597700  |

### [Zn(pyridine)<sub>2</sub>]<sup>+</sup> (doublet) – C<sub>2</sub>

|                        |                             |
|------------------------|-----------------------------|
| Zero-point correction= | 0.180232 (Hartree/Particle) |
|------------------------|-----------------------------|

Thermal correction to Energy= 0.192519  
Thermal correction to Enthalpy= 0.193464  
Thermal correction to Gibbs Free Energy= 0.137530  
Sum of electronic and zero-point Energies= -2275.480690  
Sum of electronic and thermal Energies= -2275.468403  
Sum of electronic and thermal Enthalpies= -2275.467459  
Sum of electronic and thermal Free Energies= -2275.523393

|    |             |             |             |
|----|-------------|-------------|-------------|
| Zn | 0.00000000  | 0.00000000  | 1.58894500  |
| N  | 0.00000000  | 1.64412400  | 0.23893400  |
| C  | 0.72032800  | 1.64437700  | -0.89710600 |
| C  | 0.80681300  | 2.75462200  | -1.71887300 |
| C  | 0.12124500  | 3.90928000  | -1.35775700 |
| C  | -0.62378300 | 3.91360300  | -0.18470000 |
| C  | -0.65459800 | 2.76567500  | 0.58873200  |
| H  | -1.21290300 | 2.72350600  | 1.52021800  |
| H  | -1.17087900 | 4.79251000  | 0.13414400  |
| H  | 0.17080600  | 4.79507000  | -1.98148800 |
| H  | 1.40325600  | 2.71176700  | -2.62223000 |
| H  | 1.23948400  | 0.72070000  | -1.13913100 |
| N  | 0.00000000  | -1.64412400 | 0.23893400  |
| C  | 0.65459800  | -2.76567500 | 0.58873200  |
| C  | 0.62378300  | -3.91360300 | -0.18470000 |
| C  | -0.12124500 | -3.90928000 | -1.35775700 |
| C  | -0.80681300 | -2.75462200 | -1.71887300 |
| C  | -0.72032800 | -1.64437700 | -0.89710600 |
| H  | -1.23948400 | -0.72070000 | -1.13913100 |
| H  | -1.40325600 | -2.71176700 | -2.62223000 |
| H  | -0.17080600 | -4.79507000 | -1.98148800 |
| H  | 1.17087900  | -4.79251000 | 0.13414400  |
| H  | 1.21290300  | -2.72350600 | 1.52021800  |

**[Zn(pyridine)<sub>2</sub>]<sup>+</sup> (doublet) – C<sub>s</sub>**

Zero-point correction= 0.180140 (Hartree/Particle)

Thermal correction to Energy= 0.192456  
Thermal correction to Enthalpy= 0.193400  
Thermal correction to Gibbs Free Energy= 0.137286  
Sum of electronic and zero-point Energies= -2275.479951  
Sum of electronic and thermal Energies= -2275.467635  
Sum of electronic and thermal Enthalpies= -2275.466691  
Sum of electronic and thermal Free Energies= -2275.522805

|    |             |             |             |
|----|-------------|-------------|-------------|
| Zn | -1.29941200 | -0.96828400 | 0.00000000  |
| N  | 0.76286000  | -1.48202700 | 0.00000000  |
| C  | 1.74445800  | -0.56311900 | 0.00000000  |
| C  | 3.08419500  | -0.91093200 | 0.00000000  |
| C  | 3.42517600  | -2.25884600 | 0.00000000  |
| C  | 2.41354800  | -3.21153900 | 0.00000000  |
| C  | 1.09665000  | -2.78515800 | 0.00000000  |
| H  | 0.26950300  | -3.49022700 | 0.00000000  |
| H  | 2.63610700  | -4.27167400 | 0.00000000  |
| H  | 4.46625600  | -2.56233500 | 0.00000000  |
| H  | 3.84271300  | -0.13718100 | 0.00000000  |
| H  | 1.43108100  | 0.47663200  | 0.00000000  |
| N  | -1.17643700 | 1.16299900  | 0.00000000  |
| C  | -1.18066200 | 1.84919400  | 1.15624100  |
| C  | -1.18066200 | 3.23305900  | 1.19784700  |
| C  | -1.18173700 | 3.93866000  | 0.00000000  |
| C  | -1.18066200 | 3.23305900  | -1.19784700 |
| C  | -1.18066200 | 1.84919400  | -1.15624100 |
| H  | -1.18598300 | 1.25804400  | -2.06814300 |
| H  | -1.18390800 | 3.74287400  | -2.15396000 |
| H  | -1.18632500 | 5.02322200  | 0.00000000  |
| H  | -1.18390800 | 3.74287400  | 2.15396000  |
| H  | -1.18598300 | 1.25804400  | 2.06814300  |

**[Zn(pyridine)<sub>3</sub>]<sup>+</sup> (doublet)\* - C<sub>3</sub>**

Zero-point correction= 0.269043 (Hartree/Particle)  
Thermal correction to Energy= 0.287603

Thermal correction to Enthalpy= 0.288547  
Thermal correction to Gibbs Free Energy= 0.213146  
Sum of electronic and zero-point Energies= -2523.743094  
Sum of electronic and thermal Energies= -2523.724534  
Sum of electronic and thermal Enthalpies= -2523.723590  
Sum of electronic and thermal Free Energies= -2523.798991

|    |             |             |             |
|----|-------------|-------------|-------------|
| Zn | 0.00000000  | 0.00000000  | 1.30494100  |
| N  | -0.37515900 | 1.84488400  | 0.24645000  |
| C  | -1.26827500 | 1.97453900  | -0.74870200 |
| C  | -1.57654800 | 3.19812600  | -1.32175000 |
| C  | -0.93109100 | 4.33742500  | -0.85541700 |
| C  | 0.00000000  | 4.20941700  | 0.16980200  |
| C  | 0.24162600  | 2.95162600  | 0.69616400  |
| H  | 0.94648600  | 2.80156600  | 1.51125400  |
| H  | 0.52723100  | 5.06990900  | 0.56385800  |
| H  | -1.15124100 | 5.30983300  | -1.28210000 |
| H  | -2.30724700 | 3.25181800  | -2.11998200 |
| H  | -1.74288800 | 1.05815500  | -1.08817100 |
| N  | -1.41013700 | -1.24733900 | 0.24645000  |
| C  | -1.07586400 | -2.08562800 | -0.74870200 |
| C  | -1.98138500 | -2.96439400 | -1.32175000 |
| C  | -3.29077500 | -2.97506100 | -0.85541700 |
| C  | -3.64546200 | -2.10470800 | 0.16980200  |
| C  | -2.67699600 | -1.26655900 | 0.69616400  |
| H  | -2.89947100 | -0.58110300 | 1.51125400  |
| H  | -4.65428600 | -2.07835900 | 0.56385800  |
| H  | -4.02283000 | -3.65192100 | -1.28210000 |
| H  | -1.66253300 | -3.62404400 | -2.11998200 |
| H  | -0.04494500 | -2.03846300 | -1.08817100 |
| N  | 1.78529600  | -0.59754500 | 0.24645000  |
| C  | 2.34413900  | 0.11108900  | -0.74870200 |
| C  | 3.55793300  | -0.23373200 | -1.32175000 |
| C  | 4.22186600  | -1.36236400 | -0.85541700 |
| C  | 3.64546200  | -2.10470800 | 0.16980200  |
| C  | 2.43537000  | -1.68506700 | 0.69616400  |

|   |            |             |             |
|---|------------|-------------|-------------|
| H | 1.95298500 | -2.22046400 | 1.51125400  |
| H | 4.12705500 | -2.99155000 | 0.56385800  |
| H | 5.17407100 | -1.65791300 | -1.28210000 |
| H | 3.96978100 | 0.37222600  | -2.11998200 |
| H | 1.78783300 | 0.98030800  | -1.08817100 |

**[Zn(pyridine)<sub>4</sub>]<sup>+</sup> (doublet) – D<sub>2d</sub>**

|                                              |                             |
|----------------------------------------------|-----------------------------|
| Zero-point correction=                       | 0.357217 (Hartree/Particle) |
| Thermal correction to Energy=                | 0.381147                    |
| Thermal correction to Enthalpy=              | 0.382091                    |
| Thermal correction to Gibbs Free Energy=     | 0.299344                    |
| Sum of electronic and zero-point Energies=   | -2772.009992                |
| Sum of electronic and thermal Energies=      | -2771.986062                |
| Sum of electronic and thermal Enthalpies=    | -2771.985118                |
| Sum of electronic and thermal Free Energies= | -2772.067866                |

|    |             |             |             |
|----|-------------|-------------|-------------|
| Zn | 0.00000000  | 0.00000000  | 0.00000000  |
| N  | 0.00000000  | 1.63666500  | 1.19888400  |
| C  | -1.16093200 | 2.12247700  | 1.71088500  |
| C  | -1.19815200 | 3.08645700  | 2.69581000  |
| C  | 0.00000000  | 3.59063700  | 3.20541700  |
| C  | 1.19815200  | 3.08645700  | 2.69581000  |
| C  | 1.16093200  | 2.12247700  | 1.71088500  |
| H  | 2.07519800  | 1.70544000  | 1.29712500  |
| H  | 2.15588500  | 3.43883300  | 3.06000900  |
| H  | 0.00000000  | 4.34846800  | 3.97994200  |
| H  | -2.15588500 | 3.43883300  | 3.06000900  |
| H  | -2.07519800 | 1.70544000  | 1.29712500  |
| N  | -1.63666500 | 0.00000000  | -1.19888400 |
| C  | -2.12247700 | -1.16093200 | -1.71088500 |
| C  | -3.08645700 | -1.19815200 | -2.69581000 |
| C  | -3.59063700 | 0.00000000  | -3.20541700 |
| C  | -3.08645700 | 1.19815200  | -2.69581000 |
| C  | -2.12247700 | 1.16093200  | -1.71088500 |

|   |             |             |             |
|---|-------------|-------------|-------------|
| H | -1.70544000 | 2.07519800  | -1.29712500 |
| H | -3.43883300 | 2.15588500  | -3.06000900 |
| H | -4.34846800 | 0.00000000  | -3.97994200 |
| H | -3.43883300 | -2.15588500 | -3.06000900 |
| H | -1.70544000 | -2.07519800 | -1.29712500 |
| N | 0.00000000  | -1.63666500 | 1.19888400  |
| C | 1.16093200  | -2.12247700 | 1.71088500  |
| C | 1.19815200  | -3.08645700 | 2.69581000  |
| C | 0.00000000  | -3.59063700 | 3.20541700  |
| C | -1.19815200 | -3.08645700 | 2.69581000  |
| C | -1.16093200 | -2.12247700 | 1.71088500  |
| H | -2.07519800 | -1.70544000 | 1.29712500  |
| H | -2.15588500 | -3.43883300 | 3.06000900  |
| H | 0.00000000  | -4.34846800 | 3.97994200  |
| H | 2.15588500  | -3.43883300 | 3.06000900  |
| H | 2.07519800  | -1.70544000 | 1.29712500  |
| N | 1.63666500  | 0.00000000  | -1.19888400 |
| C | 2.12247700  | 1.16093200  | -1.71088500 |
| C | 3.08645700  | 1.19815200  | -2.69581000 |
| C | 3.59063700  | 0.00000000  | -3.20541700 |
| C | 3.08645700  | -1.19815200 | -2.69581000 |
| C | 2.12247700  | -1.16093200 | -1.71088500 |
| H | 1.70544000  | -2.07519800 | -1.29712500 |
| H | 3.43883300  | -2.15588500 | -3.06000900 |
| H | 4.34846800  | 0.00000000  | -3.97994200 |
| H | 3.43883300  | 2.15588500  | -3.06000900 |
| H | 1.70544000  | 2.07519800  | -1.29712500 |

**[Zn(O<sub>2</sub>)]<sup>+</sup> (doublet) – C<sub>s</sub>**

|                                            |                             |
|--------------------------------------------|-----------------------------|
| Zero-point correction=                     | 0.004519 (Hartree/Particle) |
| Thermal correction to Energy=              | 0.008421                    |
| Thermal correction to Enthalpy=            | 0.009365                    |
| Thermal correction to Gibbs Free Energy=   | -0.023113                   |
| Sum of electronic and zero-point Energies= | -1929.260754                |
| Sum of electronic and thermal Energies=    | -1929.256852                |

Sum of electronic and thermal Enthalpies= -1929.255907  
Sum of electronic and thermal Free Energies= -1929.288386

|    |             |             |            |
|----|-------------|-------------|------------|
| Zn | 0.00000000  | 0.90448300  | 0.00000000 |
| O  | 0.42189000  | -1.26412800 | 0.00000000 |
| O  | -0.42189000 | -2.12768300 | 0.00000000 |

**[Zn(pyridine)(O<sub>2</sub>)]<sup>+</sup> (doublet) – C<sub>2v</sub>**

Zero-point correction= 0.095316 (Hartree/Particle)  
Thermal correction to Energy= 0.104489  
Thermal correction to Enthalpy= 0.105433  
Thermal correction to Gibbs Free Energy= 0.058039  
Sum of electronic and zero-point Energies= -2177.583045  
Sum of electronic and thermal Energies= -2177.573872  
Sum of electronic and thermal Enthalpies= -2177.572927  
Sum of electronic and thermal Free Energies= -2177.620322

|    |            |             |             |
|----|------------|-------------|-------------|
| Zn | 0.00000000 | 0.00000000  | 1.25085100  |
| O  | 0.00000000 | 0.68593700  | 3.05957600  |
| O  | 0.00000000 | -0.68593700 | 3.05957600  |
| N  | 0.00000000 | 0.00000000  | -0.65871600 |
| C  | 0.00000000 | 1.16964400  | -1.34409000 |
| C  | 0.00000000 | 1.19968600  | -2.72377600 |
| C  | 0.00000000 | 0.00000000  | -3.42722100 |
| C  | 0.00000000 | -1.19968600 | -2.72377600 |
| C  | 0.00000000 | -1.16964400 | -1.34409000 |
| H  | 0.00000000 | -2.08097400 | -0.75660900 |
| H  | 0.00000000 | -2.15587700 | -3.23253900 |
| H  | 0.00000000 | 0.00000000  | -4.51174000 |
| H  | 0.00000000 | 2.15587700  | -3.23253900 |
| H  | 0.00000000 | 2.08097400  | -0.75660900 |

**[Zn(pyridine)<sub>2</sub>(O<sub>2</sub>)]<sup>+</sup> (doublet) – C<sub>1</sub>**

|                                              |             |             |                             |
|----------------------------------------------|-------------|-------------|-----------------------------|
| Zero-point correction=                       |             |             | 0.187175 (Hartree/Particle) |
| Thermal correction to Energy=                |             |             | 0.201678                    |
| Thermal correction to Enthalpy=              |             |             | 0.202622                    |
| Thermal correction to Gibbs Free Energy=     |             |             | 0.142529                    |
| Sum of electronic and zero-point Energies=   |             |             | -2425.885515                |
| Sum of electronic and thermal Energies=      |             |             | -2425.871013                |
| Sum of electronic and thermal Enthalpies=    |             |             | -2425.870068                |
| Sum of electronic and thermal Free Energies= |             |             | -2425.930162                |
| Zn                                           | -0.00000100 | 0.44148300  | 0.00024600                  |
| N                                            | -1.85987500 | -0.24370200 | 0.00000200                  |
| C                                            | -2.22379400 | -1.54218500 | 0.00040300                  |
| C                                            | -3.54847700 | -1.93550500 | 0.00025700                  |
| C                                            | -4.53949000 | -0.96033600 | -0.00033200                 |
| C                                            | -4.16859900 | 0.37861700  | -0.00073300                 |
| C                                            | -2.82446300 | 0.70316700  | -0.00054500                 |
| H                                            | -2.48493200 | 1.73384300  | -0.00083600                 |
| H                                            | -4.90699700 | 1.17105000  | -0.00119000                 |
| H                                            | -5.58662200 | -1.24172100 | -0.00046800                 |
| H                                            | -3.79360600 | -2.99029800 | 0.00059200                  |
| H                                            | -1.42257600 | -2.27310600 | 0.00085300                  |
| N                                            | 1.85987300  | -0.24370300 | 0.00001600                  |
| C                                            | 2.82446200  | 0.70316500  | -0.00029800                 |
| C                                            | 4.16859800  | 0.37861500  | -0.00049600                 |
| C                                            | 4.53948900  | -0.96033800 | -0.00036600                 |
| C                                            | 3.54847600  | -1.93550700 | -0.00003400                 |
| C                                            | 2.22379200  | -1.54218600 | 0.00014400                  |
| H                                            | 1.42257500  | -2.27310700 | 0.00040100                  |
| H                                            | 3.79360400  | -2.99030000 | 0.00008400                  |
| H                                            | 5.58662100  | -1.24172300 | -0.00051200                 |
| H                                            | 4.90699600  | 1.17104900  | -0.00075100                 |
| H                                            | 2.48493200  | 1.73384100  | -0.00038400                 |
| O                                            | -0.00001000 | 2.35258000  | 0.67651700                  |
| O                                            | 0.00002100  | 2.35276600  | -0.67567800                 |

**[Zn(pyridine)<sub>3</sub>(O<sub>2</sub>)]<sup>+</sup> (doublet) – C<sub>1</sub>**



Zero-point correction= 0.276658 (Hartree/Particle)  
Thermal correction to Energy= 0.297423  
Thermal correction to Enthalpy= 0.298367  
Thermal correction to Gibbs Free Energy= 0.222174  
Sum of electronic and zero-point Energies= -2674.156980  
Sum of electronic and thermal Energies= -2674.136215  
Sum of electronic and thermal Enthalpies= -2674.135271  
Sum of electronic and thermal Free Energies= -2674.211464

|    |             |             |             |
|----|-------------|-------------|-------------|
| Zn | -0.01751200 | -0.02849800 | 0.63201200  |
| N  | -1.86758000 | -0.44928800 | -0.16252600 |
| C  | -2.16837000 | -0.21994900 | -1.45433400 |
| C  | -3.40573500 | -0.51874700 | -1.99591700 |
| C  | -4.37630500 | -1.07872300 | -1.17202000 |
| C  | -4.07084000 | -1.31744800 | 0.16164800  |
| C  | -2.80915100 | -0.99275600 | 0.63254500  |
| H  | -2.51274200 | -1.17628200 | 1.66029500  |
| H  | -4.79587700 | -1.75448600 | 0.83728300  |
| H  | -5.35584600 | -1.32665600 | -1.56680700 |
| H  | -3.59991200 | -0.31779400 | -3.04251700 |
| H  | -1.37959500 | 0.21614200  | -2.06247400 |
| N  | 1.43990200  | -1.24677800 | -0.16473400 |
| C  | 2.00966600  | -1.02394700 | -1.36394400 |
| C  | 2.98511400  | -1.85204900 | -1.89039800 |
| C  | 3.39223500  | -2.95755600 | -1.15134600 |
| C  | 2.80860600  | -3.19082000 | 0.08673400  |
| C  | 1.83694800  | -2.31810300 | 0.54932600  |
| H  | 1.33822600  | -2.45706700 | 1.50400000  |
| H  | 3.09632400  | -4.03947000 | 0.69512700  |
| H  | 4.15398200  | -3.62619500 | -1.53772700 |
| H  | 3.41311100  | -1.63222500 | -2.86113200 |
| H  | 1.66413800  | -0.14769000 | -1.90674800 |
| N  | 0.47819400  | 1.90324800  | 0.06437900  |
| C  | -0.46876900 | 2.83597500  | -0.14907400 |
| C  | -0.17105600 | 4.17919500  | -0.30122900 |
| C  | 1.15639300  | 4.58373600  | -0.22827900 |

|   |             |             |             |
|---|-------------|-------------|-------------|
| C | 2.13959300  | 3.62668600  | -0.00621700 |
| C | 1.76176700  | 2.30357800  | 0.13759700  |
| H | 2.49675500  | 1.52637200  | 0.32688300  |
| H | 3.18594400  | 3.89826800  | 0.06314800  |
| H | 1.42053800  | 5.63003400  | -0.33736300 |
| H | -0.96978200 | 4.89180500  | -0.46742500 |
| H | -1.49373400 | 2.47822200  | -0.18834700 |
| O | -0.08981100 | -0.29822700 | 2.56206600  |
| O | -0.43648300 | -1.59086600 | 2.51706700  |

**[Zn(H<sub>2</sub>O)]<sup>+</sup> (doublet) – C<sub>2v</sub>**

|                                              |                             |
|----------------------------------------------|-----------------------------|
| Zero-point correction=                       | 0.023754 (Hartree/Particle) |
| Thermal correction to Energy=                | 0.027668                    |
| Thermal correction to Enthalpy=              | 0.028612                    |
| Thermal correction to Gibbs Free Energy=     | -0.001273                   |
| Sum of electronic and zero-point Energies=   | -1855.367382                |
| Sum of electronic and thermal Energies=      | -1855.363468                |
| Sum of electronic and thermal Enthalpies=    | -1855.362524                |
| Sum of electronic and thermal Free Energies= | -1855.392409                |

|    |            |             |             |
|----|------------|-------------|-------------|
| Zn | 0.00000000 | 0.00000000  | 0.54617300  |
| O  | 0.00000000 | 0.00000000  | -1.52433900 |
| H  | 0.00000000 | 0.78139800  | -2.09523400 |
| H  | 0.00000000 | -0.78139800 | -2.09523400 |

**[Zn(pyridine)(H<sub>2</sub>O)]<sup>+</sup> (doublet) – C<sub>1</sub>**

|                                            |                             |
|--------------------------------------------|-----------------------------|
| Zero-point correction=                     | 0.114535 (Hartree/Particle) |
| Thermal correction to Energy=              | 0.124137                    |
| Thermal correction to Enthalpy=            | 0.125082                    |
| Thermal correction to Gibbs Free Energy=   | 0.077323                    |
| Sum of electronic and zero-point Energies= | -2103.656090                |
| Sum of electronic and thermal Energies=    | -2103.646487                |

Sum of electronic and thermal Enthalpies= -2103.645543  
Sum of electronic and thermal Free Energies= -2103.693301

|    |             |             |             |
|----|-------------|-------------|-------------|
| Zn | 1.65460200  | -0.60679900 | -0.16272100 |
| N  | -0.38041700 | -0.16872100 | -0.02247000 |
| C  | -0.85509100 | 1.06979900  | -0.25420200 |
| C  | -2.20970300 | 1.35196600  | -0.23587100 |
| C  | -3.10653900 | 0.32358900  | 0.03119800  |
| C  | -2.61736600 | -0.95558700 | 0.26941000  |
| C  | -1.25045000 | -1.16458000 | 0.23047700  |
| H  | -0.82207600 | -2.14754500 | 0.40335000  |
| H  | -3.28112500 | -1.78527500 | 0.48009800  |
| H  | -4.17369400 | 0.51638400  | 0.05117300  |
| H  | -2.54992000 | 2.36213100  | -0.42962700 |
| H  | -0.11589800 | 1.83798300  | -0.45788600 |
| O  | 2.34223500  | 1.41958900  | 0.41753000  |
| H  | 3.18890100  | 1.74079200  | 0.08452100  |
| H  | 2.27568200  | 1.75270000  | 1.32097700  |

**[Zn(pyridine)<sub>2</sub>(H<sub>2</sub>O)]<sup>+</sup> (doublet) – C<sub>1</sub>**

Zero-point correction= 0.204657 (Hartree/Particle)  
Thermal correction to Energy= 0.220123  
Thermal correction to Enthalpy= 0.221067  
Thermal correction to Gibbs Free Energy= 0.158776  
Sum of electronic and zero-point Energies= -2351.922008  
Sum of electronic and thermal Energies= -2351.906542  
Sum of electronic and thermal Enthalpies= -2351.905598  
Sum of electronic and thermal Free Energies= -2351.967888

|   |             |             |             |
|---|-------------|-------------|-------------|
| C | -1.47092500 | 1.33224200  | 0.08310700  |
| N | -1.64021700 | 0.02127800  | -0.15507100 |
| C | -2.89423900 | -0.45156900 | -0.26363200 |
| C | -4.01162500 | 0.35407700  | -0.12726200 |
| C | -3.82973000 | 1.71016400  | 0.11864300  |
| C | -2.53598000 | 2.20729000  | 0.22417900  |

|    |             |             |             |
|----|-------------|-------------|-------------|
| Zn | -0.04625400 | -1.36679400 | -0.56766000 |
| N  | 1.66127700  | -0.14164700 | -0.17422800 |
| C  | 2.43268700  | 0.21637500  | -1.21486800 |
| C  | 3.58937500  | 0.96211600  | -1.06225000 |
| C  | 3.97113700  | 1.34744700  | 0.21732000  |
| C  | 3.17832500  | 0.97652300  | 1.29782000  |
| C  | 2.03333800  | 0.23380500  | 1.06172500  |
| H  | 1.38301900  | -0.08676600 | 1.87041200  |
| H  | 3.44164400  | 1.25486100  | 2.31134000  |
| H  | 4.87542200  | 1.92659600  | 0.37089900  |
| H  | 4.17884300  | 1.22710900  | -1.93154800 |
| H  | 2.09789600  | -0.12074200 | -2.19303900 |
| H  | -0.44362900 | 1.67804400  | 0.15759200  |
| H  | -2.34973100 | 3.25800500  | 0.41221800  |
| H  | -4.68366900 | 2.37097800  | 0.22178500  |
| H  | -5.00203000 | -0.07494900 | -0.22081100 |
| H  | -2.98262600 | -1.51490500 | -0.47776000 |
| O  | -0.15584800 | -2.05657900 | 1.61505200  |
| H  | -1.01136000 | -2.02658800 | 2.05831400  |
| H  | 0.20904200  | -2.92343900 | 1.82640700  |

**[Zn(pyridine)<sub>3</sub>(H<sub>2</sub>O)]<sup>+</sup> (doublet) – C<sub>1</sub>**

|                                              |                             |
|----------------------------------------------|-----------------------------|
| Zero-point correction=                       | 0.292789 (Hartree/Particle) |
| Thermal correction to Energy=                | 0.313822                    |
| Thermal correction to Enthalpy=              | 0.314766                    |
| Thermal correction to Gibbs Free Energy=     | 0.239281                    |
| Sum of electronic and zero-point Energies=   | -2600.182781                |
| Sum of electronic and thermal Energies=      | -2600.161748                |
| Sum of electronic and thermal Enthalpies=    | -2600.160804                |
| Sum of electronic and thermal Free Energies= | -2600.236289                |

|    |             |             |            |
|----|-------------|-------------|------------|
| H  | -0.18225000 | -0.91305900 | 2.96132400 |
| O  | -0.25548000 | -0.06804800 | 2.50462700 |
| H  | 0.14498400  | 0.58387400  | 3.08964300 |
| Zn | 0.04819300  | -0.00634500 | 0.32466200 |

|   |             |             |             |
|---|-------------|-------------|-------------|
| N | 2.01195100  | -0.00884400 | 0.05042900  |
| C | 2.72656000  | -1.17351300 | 0.04997000  |
| C | 4.09566300  | -1.20904300 | -0.08384800 |
| C | 4.80904700  | -0.01440700 | -0.22121200 |
| C | 4.08784500  | 1.18389800  | -0.20592500 |
| C | 2.71916500  | 1.15377800  | -0.06939000 |
| H | 2.15057200  | -2.08623300 | 0.17032100  |
| H | 4.60152500  | -2.16763500 | -0.07853700 |
| H | 5.88653600  | -0.01665400 | -0.33009700 |
| H | 4.58749600  | 2.14108000  | -0.29879100 |
| H | 2.13696300  | 2.06980800  | -0.04372400 |
| N | -0.93821700 | -1.69756100 | -0.02830400 |
| C | -2.15569900 | -1.92175900 | 0.55121400  |
| C | -2.95319900 | -2.99400100 | 0.21713200  |
| C | -2.51978500 | -3.90275600 | -0.75025100 |
| C | -1.27987100 | -3.67478200 | -1.35732300 |
| C | -0.53159800 | -2.58241100 | -0.98451500 |
| H | -2.46801700 | -1.19981200 | 1.29976000  |
| H | -3.90806300 | -3.11721600 | 0.71480100  |
| H | -3.12713400 | -4.75604200 | -1.02566900 |
| H | -0.89698500 | -4.34223900 | -2.12022700 |
| H | 0.42509400  | -2.37268100 | -1.45331100 |
| N | -0.89290100 | 1.71458800  | -0.01989900 |
| C | -2.00060100 | 2.06494400  | 0.69553300  |
| C | -2.77499900 | 3.16000500  | 0.37783400  |
| C | -2.42868300 | 3.95664200  | -0.71380800 |
| C | -1.29738300 | 3.60165800  | -1.45576000 |
| C | -0.56900500 | 2.49250600  | -1.09152900 |
| H | -2.23741500 | 1.43431300  | 1.54605200  |
| H | -3.64211600 | 3.38851700  | 0.98625900  |
| H | -3.02035600 | 4.82354500  | -0.98109700 |
| H | -0.98492200 | 4.18113800  | -2.31620500 |
| H | 0.30155900  | 2.18220000  | -1.66168800 |

## Zn<sup>2+</sup> COMPLEXES

### [Zn(pyridine)]<sup>2+</sup> (singlet) – C<sub>2v</sub>

Zero-point correction= 0.089532 (Hartree/Particle)  
Thermal correction to Energy= 0.095609  
Thermal correction to Enthalpy= 0.096554  
Thermal correction to Gibbs Free Energy= 0.059005  
Sum of electronic and zero-point Energies= -2026.733135  
Sum of electronic and thermal Energies= -2026.727058  
Sum of electronic and thermal Enthalpies= -2026.726114  
Sum of electronic and thermal Free Energies= -2026.763663

|    |            |             |             |
|----|------------|-------------|-------------|
| N  | 0.00000000 | 0.00000000  | 0.01348500  |
| C  | 0.00000000 | 1.18841100  | -0.65647800 |
| C  | 0.00000000 | 1.20260900  | -2.03578800 |
| C  | 0.00000000 | 0.00000000  | -2.73796900 |
| C  | 0.00000000 | -1.20260900 | -2.03578800 |
| C  | 0.00000000 | -1.18841100 | -0.65647800 |
| H  | 0.00000000 | 2.10506500  | -0.07772900 |
| H  | 0.00000000 | 2.16373700  | -2.53997000 |
| H  | 0.00000000 | 0.00000000  | -3.82385500 |
| H  | 0.00000000 | -2.16373700 | -2.53997000 |
| H  | 0.00000000 | -2.10506500 | -0.07772900 |
| Zn | 0.00000000 | 0.00000000  | 1.92332900  |

### [Zn(pyridine)]<sup>2+</sup> (singlet) – ~η<sup>6</sup>

Zero-point correction= 0.088880 (Hartree/Particle)  
Thermal correction to Energy= 0.094910  
Thermal correction to Enthalpy= 0.095854  
Thermal correction to Gibbs Free Energy= 0.058381  
Sum of electronic and zero-point Energies= -2026.675796  
Sum of electronic and thermal Energies= -2026.669765  
Sum of electronic and thermal Enthalpies= -2026.668821  
Sum of electronic and thermal Free Energies= -2026.706294

|    |             |             |             |
|----|-------------|-------------|-------------|
| C  | -0.86599322 | -1.17139002 | -0.62062690 |
| N  | -0.92959581 | 0.00009083  | -1.30903823 |
| C  | -0.86569752 | 1.17156424  | -0.62065055 |
| C  | -0.63446829 | 1.22585311  | 0.77967341  |
| C  | -0.50875441 | 0.00006577  | 1.49228889  |
| C  | -0.63472889 | -1.22570534 | 0.77968749  |
| Zn | 1.03102457  | -0.00011157 | -0.14739617 |
| H  | -0.96676259 | -2.07903735 | -1.21379612 |
| H  | -0.55591830 | -2.18127970 | 1.29317457  |
| H  | -0.32129137 | 0.00005847  | 2.56421915  |
| H  | -0.55555269 | 2.18141676  | 1.29316567  |
| H  | -0.96618755 | 2.07922647  | -1.21384460 |

**[Zn(pyridine)<sub>2</sub>]<sup>2+</sup> (singlet) – D<sub>2d</sub>**

|                                              |                             |
|----------------------------------------------|-----------------------------|
| Zero-point correction=                       | 0.181212 (Hartree/Particle) |
| Thermal correction to Energy=                | 0.192953                    |
| Thermal correction to Enthalpy=              | 0.193897                    |
| Thermal correction to Gibbs Free Energy=     | 0.141452                    |
| Sum of electronic and zero-point Energies=   | -2275.137829                |
| Sum of electronic and thermal Energies=      | -2275.126088                |
| Sum of electronic and thermal Enthalpies=    | -2275.125144                |
| Sum of electronic and thermal Free Energies= | -2275.177588                |

|    |             |             |            |
|----|-------------|-------------|------------|
| C  | 0.00000000  | 1.17494616  | 2.58417891 |
| N  | 0.00000000  | 0.00000000  | 1.89608561 |
| C  | 0.00000000  | -1.17494616 | 2.58417891 |
| C  | 0.00000000  | -1.20203633 | 3.96132530 |
| C  | 0.00000000  | 0.00000000  | 4.66571697 |
| C  | -0.00000000 | 1.20203633  | 3.96132530 |
| Zn | 0.00000000  | -0.00000000 | 0.00000000 |
| H  | 0.00000000  | 2.09073055  | 2.00276190 |
| H  | 0.00000000  | 2.15671944  | 4.47249363 |
| H  | 0.00000000  | 0.00000000  | 5.75060713 |
| H  | 0.00000000  | -2.15671944 | 4.47249363 |

|   |             |             |             |
|---|-------------|-------------|-------------|
| H | 0.00000000  | -2.09073055 | 2.00276190  |
| N | -0.00000000 | -0.00000000 | -1.89608561 |
| C | 1.17494616  | -0.00000000 | -2.58417891 |
| C | 1.20203633  | -0.00000000 | -3.96132530 |
| C | -0.00000000 | -0.00000000 | -4.66571697 |
| C | -1.20203633 | -0.00000000 | -3.96132530 |
| C | -1.17494616 | -0.00000000 | -2.58417891 |
| H | -2.09073055 | 0.00000000  | -2.00276190 |
| H | -2.15671944 | -0.00000000 | -4.47249363 |
| H | -0.00000000 | -0.00000000 | -5.75060713 |
| H | 2.15671944  | -0.00000000 | -4.47249363 |
| H | 2.09073055  | -0.00000000 | -2.00276190 |

**[Zn(pyridine)<sub>3</sub>]<sup>2+</sup> (singlet)\* - C<sub>3</sub>**

|                                              |                             |
|----------------------------------------------|-----------------------------|
| Zero-point correction=                       | 0.271481 (Hartree/Particle) |
| Thermal correction to Energy=                | 0.289128                    |
| Thermal correction to Enthalpy=              | 0.290072                    |
| Thermal correction to Gibbs Free Energy=     | 0.222483                    |
| Sum of electronic and zero-point Energies=   | -2523.459965                |
| Sum of electronic and thermal Energies=      | -2523.442318                |
| Sum of electronic and thermal Enthalpies=    | -2523.441374                |
| Sum of electronic and thermal Free Energies= | -2523.508964                |

|    |             |            |             |
|----|-------------|------------|-------------|
| Zn | 0.00000000  | 0.00000000 | 0.01507200  |
| N  | 0.00000000  | 1.98518600 | 0.00745900  |
| C  | -0.95756300 | 2.67041700 | -0.66097500 |
| C  | -0.98557000 | 4.05121200 | -0.69435000 |
| C  | -0.00154600 | 4.76208600 | -0.01451500 |
| C  | 0.98299800  | 4.06303700 | 0.67669100  |
| C  | 0.95668300  | 2.68180300 | 0.66528300  |
| H  | 1.70682000  | 2.10057300 | 1.19266800  |
| H  | 1.76543900  | 4.57793700 | 1.22054900  |
| H  | -0.00188400 | 5.84661400 | -0.02321600 |
| H  | -1.76851000 | 4.55667200 | -1.24625600 |
| H  | -1.70691500 | 2.08023400 | -1.17948200 |



|   |             |             |             |
|---|-------------|-------------|-------------|
| N | -1.71922200 | -0.99259300 | 0.00745900  |
| C | -1.83386800 | -2.16448300 | -0.66097500 |
| C | -3.01566800 | -2.87913400 | -0.69435000 |
| C | -4.12331500 | -2.38238200 | -0.01451500 |
| C | -4.01019200 | -1.18021700 | 0.67669100  |
| C | -2.80085100 | -0.51238900 | 0.66528300  |
| H | -2.67256000 | 0.42786400  | 1.19266800  |
| H | -4.84733000 | -0.76005400 | 1.22054900  |
| H | -5.06237400 | -2.92493800 | -0.02321600 |
| H | -3.06193900 | -3.80991000 | -1.24625600 |
| H | -0.94807800 | -2.51834800 | -1.17948200 |
| N | 1.71922200  | -0.99259300 | 0.00745900  |
| C | 2.79143100  | -0.50593500 | -0.66097500 |
| C | 4.00123700  | -1.17207800 | -0.69435000 |
| C | 4.12486100  | -2.37970400 | -0.01451500 |
| C | 3.02719400  | -2.88282000 | 0.67669100  |
| C | 1.84416700  | -2.16941300 | 0.66528300  |
| H | 0.96573900  | -2.52843600 | 1.19266800  |
| H | 3.08189100  | -3.81788400 | 1.22054900  |
| H | 5.06425800  | -2.92167600 | -0.02321600 |
| H | 4.83044800  | -0.74676200 | -1.24625600 |
| H | 2.65499300  | 0.43811500  | -1.17948200 |

**[Zn(pyridine)<sub>3</sub>]<sup>2+</sup> (singlet) - C<sub>s</sub>**

|                                              |                             |
|----------------------------------------------|-----------------------------|
| Zero-point correction=                       | 0.272172 (Hartree/Particle) |
| Thermal correction to Energy=                | 0.289716                    |
| Thermal correction to Enthalpy=              | 0.290660                    |
| Thermal correction to Gibbs Free Energy=     | 0.222477                    |
| Sum of electronic and zero-point Energies=   | -2523.455713                |
| Sum of electronic and thermal Energies=      | -2523.438169                |
| Sum of electronic and thermal Enthalpies=    | -2523.437224                |
| Sum of electronic and thermal Free Energies= | -2523.505408                |

|    |            |             |            |
|----|------------|-------------|------------|
| Zn | 0.09824600 | -0.15846500 | 0.00000000 |
| N  | 1.00001600 | -0.02825000 | 1.76853500 |

|   |             |             |             |
|---|-------------|-------------|-------------|
| C | 1.88403900  | -0.94337100 | 2.22683800  |
| C | 2.50280000  | -0.81513600 | 3.45647700  |
| C | 2.21313500  | 0.29183300  | 4.24709200  |
| C | 1.30779800  | 1.23851700  | 3.77865700  |
| C | 0.72213300  | 1.04778600  | 2.54239900  |
| H | 2.08601400  | -1.79502200 | 1.58515200  |
| H | 3.20153900  | -1.57576400 | 3.78313700  |
| H | 2.68675000  | 0.41495300  | 5.21496200  |
| H | 1.05619900  | 2.11690600  | 4.36022500  |
| H | 0.01230900  | 1.76702800  | 2.14367700  |
| N | -1.89355200 | -0.16135400 | 0.00000000  |
| C | -2.58491600 | -0.16154700 | -1.16362200 |
| C | -3.96572000 | -0.15164400 | -1.19913800 |
| C | -4.67097800 | -0.14379100 | 0.00000000  |
| C | -3.96572000 | -0.15164400 | 1.19913800  |
| C | -2.58491600 | -0.16154700 | 1.16362200  |
| H | -1.99800900 | -0.17623100 | -2.07660900 |
| H | -4.47606000 | -0.15234100 | -2.15477100 |
| H | -5.75557800 | -0.13462700 | 0.00000000  |
| H | -4.47606000 | -0.15234100 | 2.15477100  |
| H | -1.99800900 | -0.17623100 | 2.07660900  |
| N | 1.00001600  | -0.02825000 | -1.76853500 |
| C | 1.88403900  | -0.94337100 | -2.22683800 |
| C | 2.50280000  | -0.81513600 | -3.45647700 |
| C | 2.21313500  | 0.29183300  | -4.24709200 |
| C | 1.30779800  | 1.23851700  | -3.77865700 |
| C | 0.72213300  | 1.04778600  | -2.54239900 |
| H | 2.08601400  | -1.79502200 | -1.58515200 |
| H | 3.20153900  | -1.57576400 | -3.78313700 |
| H | 2.68675000  | 0.41495300  | -5.21496200 |
| H | 1.05619900  | 2.11690600  | -4.36022500 |
| H | 0.01230900  | 1.76702800  | -2.14367700 |

**[Zn(pyridine)<sub>4</sub>]<sup>2+</sup> (singlet)**

Zero-point correction= 0.362817 (Hartree/Particle)  
Thermal correction to Energy= 0.386213  
Thermal correction to Enthalpy= 0.387157  
Thermal correction to Gibbs Free Energy= 0.306561  
Sum of electronic and zero-point Energies= -2771.753976  
Sum of electronic and thermal Energies= -2771.730580  
Sum of electronic and thermal Enthalpies= -2771.729635  
Sum of electronic and thermal Free Energies= -2771.810232

|    |             |             |             |
|----|-------------|-------------|-------------|
| Zn | 0.00000000  | 0.00000000  | 0.00000000  |
| N  | 0.00000000  | 1.64140200  | 1.22394800  |
| C  | -1.15780000 | 2.15034800  | 1.69314100  |
| C  | -1.19813700 | 3.17521600  | 2.62149100  |
| C  | 0.00000000  | 3.69904100  | 3.09466700  |
| C  | 1.19813700  | 3.17521600  | 2.62149100  |
| C  | 1.15780000  | 2.15034800  | 1.69314100  |
| H  | 2.07204500  | 1.70869500  | 1.30559100  |
| H  | 2.15343900  | 3.55077400  | 2.96735200  |
| H  | 0.00000000  | 4.50227400  | 3.82358300  |
| H  | -2.15343900 | 3.55077400  | 2.96735200  |
| H  | -2.07204500 | 1.70869500  | 1.30559100  |
| N  | -1.64140200 | 0.00000000  | -1.22394800 |
| C  | -2.15034800 | -1.15780000 | -1.69314100 |
| C  | -3.17521600 | -1.19813700 | -2.62149100 |
| C  | -3.69904100 | 0.00000000  | -3.09466700 |
| C  | -3.17521600 | 1.19813700  | -2.62149100 |
| C  | -2.15034800 | 1.15780000  | -1.69314100 |
| H  | -1.70869500 | 2.07204500  | -1.30559100 |
| H  | -3.55077400 | 2.15343900  | -2.96735200 |
| H  | -4.50227400 | 0.00000000  | -3.82358300 |
| H  | -3.55077400 | -2.15343900 | -2.96735200 |
| H  | -1.70869500 | -2.07204500 | -1.30559100 |
| N  | 0.00000000  | -1.64140200 | 1.22394800  |
| C  | 1.15780000  | -2.15034800 | 1.69314100  |
| C  | 1.19813700  | -3.17521600 | 2.62149100  |
| C  | 0.00000000  | -3.69904100 | 3.09466700  |

|   |             |             |             |
|---|-------------|-------------|-------------|
| C | -1.19813700 | -3.17521600 | 2.62149100  |
| C | -1.15780000 | -2.15034800 | 1.69314100  |
| H | -2.07204500 | -1.70869500 | 1.30559100  |
| H | -2.15343900 | -3.55077400 | 2.96735200  |
| H | 0.00000000  | -4.50227400 | 3.82358300  |
| H | 2.15343900  | -3.55077400 | 2.96735200  |
| H | 2.07204500  | -1.70869500 | 1.30559100  |
| N | 1.64140200  | 0.00000000  | -1.22394800 |
| C | 2.15034800  | 1.15780000  | -1.69314100 |
| C | 3.17521600  | 1.19813700  | -2.62149100 |
| C | 3.69904100  | 0.00000000  | -3.09466700 |
| C | 3.17521600  | -1.19813700 | -2.62149100 |
| C | 2.15034800  | -1.15780000 | -1.69314100 |
| H | 1.70869500  | -2.07204500 | -1.30559100 |
| H | 3.55077400  | -2.15343900 | -2.96735200 |
| H | 4.50227400  | 0.00000000  | -3.82358300 |
| H | 3.55077400  | 2.15343900  | -2.96735200 |
| H | 1.70869500  | 2.07204500  | -1.30559100 |

**[Zn(O<sub>2</sub>)]<sup>2+</sup> (triplet) – C<sub>s</sub>**

|                                              |                             |
|----------------------------------------------|-----------------------------|
| Zero-point correction=                       | 0.004668 (Hartree/Particle) |
| Thermal correction to Energy=                | 0.008447                    |
| Thermal correction to Enthalpy=              | 0.009392                    |
| Thermal correction to Gibbs Free Energy=     | -0.022865                   |
| Sum of electronic and zero-point Energies=   | -1928.668314                |
| Sum of electronic and thermal Energies=      | -1928.664535                |
| Sum of electronic and thermal Enthalpies=    | -1928.663591                |
| Sum of electronic and thermal Free Energies= | -1928.695848                |

|    |             |             |            |
|----|-------------|-------------|------------|
| Zn | 0.00000000  | 0.87612108  | 0.00000000 |
| O  | 0.34531355  | -1.15293493 | 0.00000000 |
| O  | -0.34531355 | -2.13251911 | 0.00000000 |

**[Zn(pyridine)(O<sub>2</sub>)]<sup>2+</sup> (triplet) – C<sub>s</sub>**

Zero-point correction= 0.095265 (Hartree/Particle)  
Thermal correction to Energy= 0.104708  
Thermal correction to Enthalpy= 0.105652  
Thermal correction to Gibbs Free Energy= 0.057424  
Sum of electronic and zero-point Energies= -2177.123619  
Sum of electronic and thermal Energies= -2177.114176  
Sum of electronic and thermal Enthalpies= -2177.113231  
Sum of electronic and thermal Free Energies= -2177.161460

|    |             |             |            |
|----|-------------|-------------|------------|
| Zn | -0.11545500 | -1.11522700 | 0.00000000 |
| O  | 0.35294100  | -4.08002500 | 0.00000000 |
| O  | -0.36454000 | -3.10805400 | 0.00000000 |
| N  | 0.00000000  | 0.77389900  | 0.00000000 |
| C  | 1.22260100  | 1.37985100  | 0.00000000 |
| C  | 1.32559200  | 2.75394500  | 0.00000000 |
| C  | 0.16768500  | 3.52867800  | 0.00000000 |
| C  | -1.07571300 | 2.90031400  | 0.00000000 |
| C  | -1.14025500 | 1.52357000  | 0.00000000 |
| H  | -2.09011300 | 0.99986700  | 0.00000000 |
| H  | -2.00095800 | 3.46560000  | 0.00000000 |
| H  | 0.23349100  | 4.61199200  | 0.00000000 |
| H  | 2.31267300  | 3.20302900  | 0.00000000 |
| H  | 2.10187000  | 0.74552200  | 0.00000000 |

**[Zn(pyridine)<sub>2</sub>(O<sub>2</sub>)]<sup>2+</sup> (triplet)\* - C<sub>1</sub>**

Zero-point correction= 0.185833 (Hartree/Particle)  
Thermal correction to Energy= 0.201308  
Thermal correction to Enthalpy= 0.202253  
Thermal correction to Gibbs Free Energy= 0.137217  
Sum of electronic and zero-point Energies= -2425.498429  
Sum of electronic and thermal Energies= -2425.482954  
Sum of electronic and thermal Enthalpies= -2425.482010  
Sum of electronic and thermal Free Energies= -2425.547045

|    |            |             |             |
|----|------------|-------------|-------------|
| Zn | 0.04994500 | -0.08001000 | -0.00571500 |
|----|------------|-------------|-------------|

|   |             |             |             |
|---|-------------|-------------|-------------|
| N | 1.95159800  | -0.26431300 | 0.01279000  |
| C | 2.75145500  | 0.66957300  | -0.56591900 |
| C | 4.12512800  | 0.54291100  | -0.56695400 |
| C | 4.70592900  | -0.56653900 | 0.04101400  |
| C | 3.88704400  | -1.52326600 | 0.63441000  |
| C | 2.51915600  | -1.34948000 | 0.60448000  |
| H | 1.84962900  | -2.07383400 | 1.05599700  |
| H | 4.29849600  | -2.40051400 | 1.11870600  |
| H | 5.78423500  | -0.68411500 | 0.05261900  |
| H | 4.72648300  | 1.30917300  | -1.04082200 |
| H | 2.26327800  | 1.52007900  | -1.02827800 |
| N | -1.84447400 | -0.35155000 | -0.01217800 |
| C | -2.42399700 | -1.15838100 | -0.93984800 |
| C | -3.78693800 | -1.37266700 | -0.96012700 |
| C | -4.58654200 | -0.75033800 | -0.00585900 |
| C | -3.99271700 | 0.07400900  | 0.94660800  |
| C | -2.62579600 | 0.25584500  | 0.91963200  |
| H | -2.12668600 | 0.88869600  | 1.64649300  |
| H | -4.57894700 | 0.57424200  | 1.70791400  |
| H | -5.66008500 | -0.90593300 | -0.00363100 |
| H | -4.20922300 | -2.02135800 | -1.71798400 |
| H | -1.76925700 | -1.62679900 | -1.66692200 |
| O | 0.03581700  | 2.28120500  | 0.04239400  |
| O | -0.81862600 | 3.11900800  | -0.11758800 |

**[Zn(pyridine)<sub>3</sub>(O<sub>2</sub>)]<sup>2+</sup> (triplet)\*+ – C<sub>1</sub>**

|                                              |                             |
|----------------------------------------------|-----------------------------|
| Zero-point correction=                       | 0.277045 (Hartree/Particle) |
| Thermal correction to Energy=                | 0.298342                    |
| Thermal correction to Enthalpy=              | 0.299286                    |
| Thermal correction to Gibbs Free Energy=     | 0.220456                    |
| Sum of electronic and zero-point Energies=   | -2673.860529                |
| Sum of electronic and thermal Energies=      | -2673.839232                |
| Sum of electronic and thermal Enthalpies=    | -2673.838288                |
| Sum of electronic and thermal Free Energies= | -2673.917118                |

|    |             |             |             |
|----|-------------|-------------|-------------|
| Zn | 0.04354800  | 0.00297700  | -0.13355200 |
| N  | -0.38147700 | 1.93894800  | -0.25686600 |
| C  | -1.49043400 | 2.42874200  | 0.33674200  |
| C  | -1.82051400 | 3.76577000  | 0.28610300  |
| C  | -0.98605800 | 4.63765700  | -0.39999800 |
| C  | 0.15429300  | 4.13890400  | -1.01354100 |
| C  | 0.42728200  | 2.79059200  | -0.92122600 |
| H  | -2.11726200 | 1.71395600  | 0.86185200  |
| H  | -2.71939700 | 4.11459700  | 0.77872700  |
| H  | 0.83002600  | 4.78495000  | -1.55974500 |
| H  | 1.30827900  | 2.36128700  | -1.38744900 |
| N  | 1.93370700  | -0.59832500 | -0.18645700 |
| C  | 2.30228000  | -1.67783700 | -0.90770000 |
| C  | 3.60912900  | -2.11362700 | -0.95896000 |
| C  | 4.57667000  | -1.42291200 | -0.24301300 |
| C  | 4.20226600  | -0.31301700 | 0.50181100  |
| C  | 2.87866900  | 0.07107200  | 0.50723900  |
| H  | 1.51630000  | -2.19025400 | -1.45321400 |
| H  | 3.85975500  | -2.98343300 | -1.55302700 |
| H  | 4.92585800  | 0.25245200  | 1.07539300  |
| H  | 2.54451900  | 0.93210200  | 1.07805900  |
| N  | -1.42139200 | -1.33123300 | -0.28168100 |
| C  | -1.33562400 | -2.50673400 | 0.37706900  |
| C  | -2.32313000 | -3.46490900 | 0.29914200  |
| C  | -3.44133600 | -3.21491900 | -0.48468100 |
| C  | -3.53319100 | -2.00928300 | -1.16559300 |
| C  | -2.51088400 | -1.09257100 | -1.04151100 |
| H  | -0.44456300 | -2.66287600 | 0.97791900  |
| H  | -2.21315700 | -4.39267100 | 0.84648100  |
| H  | -4.38744600 | -1.77639600 | -1.78877700 |
| H  | -2.54411400 | -0.13898100 | -1.55872200 |
| H  | -1.22263300 | 5.69425400  | -0.45599000 |
| H  | 5.61141200  | -1.74590700 | -0.26506800 |
| H  | -4.23214900 | -3.95236300 | -0.56421200 |
| O  | 0.03621900  | -0.01242500 | 2.33055300  |
| O  | -0.93549900 | -0.02099000 | 3.04670700  |

**[Zn(H<sub>2</sub>O)]<sup>2+</sup> (singlet) – C<sub>2v</sub>**

Zero-point correction= 0.023946 (Hartree/Particle)  
Thermal correction to Energy= 0.027500  
Thermal correction to Enthalpy= 0.028445  
Thermal correction to Gibbs Free Energy= 0.000022  
Sum of electronic and zero-point Energies= -1854.819810  
Sum of electronic and thermal Energies= -1854.816255  
Sum of electronic and thermal Enthalpies= -1854.815311  
Sum of electronic and thermal Free Energies= -1854.843734

|    |            |             |             |
|----|------------|-------------|-------------|
| Zn | 0.00000000 | 0.00000000  | 0.49749500  |
| O  | 0.00000000 | 0.00000000  | -1.37886400 |
| H  | 0.00000000 | 0.79801100  | -1.94696800 |
| H  | 0.00000000 | -0.79801100 | -1.94696800 |

**[Zn(pyridine)(H<sub>2</sub>O)]<sup>2+</sup> (singlet)\* – C<sub>2v</sub>**

Zero-point correction= 0.115233 (Hartree/Particle)  
Thermal correction to Energy= 0.124268  
Thermal correction to Enthalpy= 0.125212  
Thermal correction to Gibbs Free Energy= 0.080411  
Sum of electronic and zero-point Energies= -2103.264511  
Sum of electronic and thermal Energies= -2103.255476  
Sum of electronic and thermal Enthalpies= -2103.254532  
Sum of electronic and thermal Free Energies= -2103.299332

|    |            |             |             |
|----|------------|-------------|-------------|
| Zn | 0.00000000 | 0.00000000  | 1.43727500  |
| N  | 0.00000000 | 0.00000000  | -0.44718200 |
| C  | 0.00000000 | 1.18035000  | -1.13117500 |
| C  | 0.00000000 | 1.20265000  | -2.50906000 |
| C  | 0.00000000 | 0.00000000  | -3.21234600 |
| C  | 0.00000000 | -1.20265000 | -2.50906000 |
| C  | 0.00000000 | -1.18035000 | -1.13117500 |
| H  | 0.00000000 | -2.09631900 | -0.55049600 |



|   |             |             |             |
|---|-------------|-------------|-------------|
| H | 0.00000000  | -2.15921600 | -3.01834200 |
| H | 0.00000000  | 0.00000000  | -4.29741600 |
| H | 0.00000000  | 2.15921600  | -3.01834200 |
| H | 0.00000000  | 2.09631900  | -0.55049600 |
| O | 0.00000000  | 0.00000000  | 3.32645900  |
| H | 0.78768500  | 0.00000000  | 3.89616200  |
| H | -0.78768500 | 0.00000000  | 3.89616200  |

**[Zn(pyridine)<sub>2</sub>(H<sub>2</sub>O)]<sup>2+</sup> (singlet) – C<sub>1</sub>**

|                                              |                             |
|----------------------------------------------|-----------------------------|
| Zero-point correction=                       | 0.206769 (Hartree/Particle) |
| Thermal correction to Energy=                | 0.221427                    |
| Thermal correction to Enthalpy=              | 0.222371                    |
| Thermal correction to Gibbs Free Energy=     | 0.162645                    |
| Sum of electronic and zero-point Energies=   | -2351.610645                |
| Sum of electronic and thermal Energies=      | -2351.595987                |
| Sum of electronic and thermal Enthalpies=    | -2351.595043                |
| Sum of electronic and thermal Free Energies= | -2351.654769                |

|    |             |             |             |
|----|-------------|-------------|-------------|
| C  | 2.22110500  | -1.13918200 | 0.79207500  |
| N  | 1.85113100  | -0.07157100 | 0.04068900  |
| C  | 2.79284900  | 0.56689000  | -0.69918800 |
| C  | 4.11253200  | 0.16270200  | -0.70623100 |
| C  | 4.48978800  | -0.92922500 | 0.07006600  |
| C  | 3.52654400  | -1.58671100 | 0.82894700  |
| Zn | -0.00003400 | 0.52234600  | 0.00005400  |
| N  | -1.85107900 | -0.07191500 | -0.04035500 |
| C  | -2.22033900 | -1.14098000 | -0.79002600 |
| C  | -3.52574800 | -1.58855100 | -0.82733100 |
| C  | -4.48972900 | -0.92954200 | -0.07070000 |
| C  | -4.11319800 | 0.16386700  | 0.70386400  |
| C  | -2.79349900 | 0.56802100  | 0.69733100  |
| H  | -2.46030500 | 1.41223800  | 1.29245000  |
| H  | -4.83156800 | 0.70237000  | 1.31026900  |
| H  | -5.52140000 | -1.26408900 | -0.08325400 |
| H  | -3.77652600 | -2.44393000 | -1.44272800 |

|   |             |             |             |
|---|-------------|-------------|-------------|
| H | -1.44137600 | -1.63076300 | -1.36511200 |
| H | 1.44270400  | -1.62777200 | 1.36894700  |
| H | 3.77790100  | -2.44091200 | 1.44574700  |
| H | 5.52145500  | -1.26379300 | 0.08224300  |
| H | 4.83031400  | 0.70001100  | -1.31439100 |
| H | 2.45910900  | 1.41000700  | -1.29557800 |
| O | -0.00029800 | 2.57454800  | 0.00057900  |
| H | 0.67599400  | 3.14978700  | 0.38171900  |
| H | -0.67509500 | 3.15074200  | -0.38175700 |

**[Zn(pyridine)<sub>3</sub>(H<sub>2</sub>O)]<sup>2+</sup> (singlet)\*+ - C<sub>1</sub>**

|                                              |                             |
|----------------------------------------------|-----------------------------|
| Zero-point correction=                       | 0.296502 (Hartree/Particle) |
| Thermal correction to Energy=                | 0.317488                    |
| Thermal correction to Enthalpy=              | 0.318433                    |
| Thermal correction to Gibbs Free Energy=     | 0.242019                    |
| Sum of electronic and zero-point Energies=   | -2599.956613                |
| Sum of electronic and thermal Energies=      | -2599.935627                |
| Sum of electronic and thermal Enthalpies=    | -2599.934682                |
| Sum of electronic and thermal Free Energies= | -2600.011096                |

|    |             |             |             |
|----|-------------|-------------|-------------|
| Zn | -0.00297116 | -0.02148000 | 0.41340613  |
| N  | 0.08922700  | 1.94663327  | 0.00568880  |
| C  | 1.04692010  | 2.71569384  | 0.56049724  |
| C  | 1.14850481  | 4.06729373  | 0.30766809  |
| C  | 0.23330921  | 4.65832485  | -0.55240197 |
| C  | -0.75270120 | 3.87212535  | -1.13015577 |
| C  | -0.79505173 | 2.52630900  | -0.82929401 |
| H  | -1.54937238 | 1.87732071  | -1.26293347 |
| H  | -1.48391296 | 4.29276135  | -1.80891399 |
| H  | 0.28954561  | 5.71882165  | -0.77047584 |
| H  | 1.93480638  | 4.64411361  | 0.77817834  |
| H  | 1.74900999  | 2.21538372  | 1.22145041  |
| N  | 1.67903208  | -1.03456640 | -0.01179895 |
| C  | 1.94074111  | -2.21509964 | 0.58446158  |
| C  | 3.07409525  | -2.94824532 | 0.30163563  |

|   |             |             |             |
|---|-------------|-------------|-------------|
| C | 3.97738717  | -2.45483151 | -0.62947151 |
| C | 3.71290445  | -1.24106284 | -1.24720234 |
| C | 2.55950453  | -0.56102418 | -0.91557648 |
| H | 2.31574576  | 0.39070342  | -1.37714157 |
| H | 4.39081537  | -0.82136563 | -1.97972411 |
| H | 4.87665517  | -3.01030650 | -0.87067307 |
| H | 3.24259312  | -3.89122530 | 0.80641991  |
| H | 1.21001234  | -2.56374850 | 1.30767207  |
| N | -1.75402668 | -0.91007323 | -0.01953928 |
| C | -2.91117035 | -0.39323118 | 0.44275240  |
| C | -4.13631607 | -0.96260580 | 0.16659190  |
| C | -4.18182319 | -2.10699105 | -0.61794492 |
| C | -2.99569715 | -2.64168283 | -1.09892051 |
| C | -1.80529071 | -2.02058741 | -0.78080703 |
| H | -0.85631716 | -2.40686241 | -1.13883874 |
| H | -2.98740260 | -3.53166040 | -1.71553279 |
| H | -5.13119244 | -2.57519798 | -0.85228472 |
| H | -5.03876799 | -0.51214618 | 0.56053309  |
| H | -2.83266435 | 0.50670247  | 1.04654038  |
| O | -0.07414990 | -0.14391371 | 2.53114158  |
| H | -0.79570487 | -0.52477063 | 3.04383004  |
| H | 0.55696104  | 0.20692084  | 3.16912970  |

**[Zn(pyridine)<sub>2</sub>(H<sub>2</sub>O)<sub>2</sub>]<sup>2+</sup> (singlet)\* – C<sub>1</sub>**

|                                              |                             |
|----------------------------------------------|-----------------------------|
| Zero-point correction=                       | 0.230457 (Hartree/Particle) |
| Thermal correction to Energy=                | 0.248659                    |
| Thermal correction to Enthalpy=              | 0.249603                    |
| Thermal correction to Gibbs Free Energy=     | 0.181332                    |
| Sum of electronic and zero-point Energies=   | -2428.079360                |
| Sum of electronic and thermal Energies=      | -2428.061157                |
| Sum of electronic and thermal Enthalpies=    | -2428.060213                |
| Sum of electronic and thermal Free Energies= | -2428.128484                |

|   |             |            |            |
|---|-------------|------------|------------|
| H | -0.74510100 | 2.12523300 | 2.33045100 |
| O | 0.03456300  | 1.84732900 | 1.83414900 |

|    |             |             |             |
|----|-------------|-------------|-------------|
| H  | 0.79203700  | 1.98390600  | 2.41625300  |
| Zn | 0.01715800  | 0.73512900  | 0.07611900  |
| N  | -1.79219300 | -0.08179600 | -0.01670000 |
| C  | -2.64370800 | 0.18240300  | -1.03373100 |
| C  | -3.89263800 | -0.40402400 | -1.11857400 |
| C  | -4.28898900 | -1.29502500 | -0.12697300 |
| C  | -3.41702500 | -1.57089400 | 0.92197400  |
| C  | -2.18278400 | -0.95066400 | 0.94581900  |
| H  | -2.29871500 | 0.88362600  | -1.78605000 |
| H  | -4.54071300 | -0.16142500 | -1.95183200 |
| H  | -5.26373600 | -1.76856800 | -0.17043900 |
| H  | -3.68604500 | -2.25796000 | 1.71493800  |
| H  | -1.47478000 | -1.13974300 | 1.74790300  |
| N  | 1.76467100  | -0.19995800 | -0.06025300 |
| C  | 2.92631300  | 0.49100800  | 0.00781900  |
| C  | 4.15851600  | -0.12942500 | -0.06784200 |
| C  | 4.20778800  | -1.51175400 | -0.22144900 |
| C  | 3.01713100  | -2.22693700 | -0.29425000 |
| C  | 1.81873000  | -1.54338400 | -0.21030400 |
| H  | 2.84511200  | 1.56851600  | 0.11950500  |
| H  | 5.06205000  | 0.46506200  | -0.00910900 |
| H  | 5.16172600  | -2.02384900 | -0.28481800 |
| H  | 3.01121100  | -3.30313400 | -0.41608000 |
| H  | 0.86859000  | -2.06543400 | -0.26692900 |
| O  | 0.13211700  | 2.36601800  | -1.20074500 |
| H  | -0.12654700 | 3.27053900  | -0.98671500 |
| H  | 0.51939700  | 2.38703100  | -2.08415500 |

## CU<sup>+</sup> COMPLEXES

### [Cu(pyridine)]<sup>+</sup> (singlet) – C<sub>2v</sub>

Zero-point correction= 0.090399 (Hartree/Particle)  
Thermal correction to Energy= 0.096436  
Thermal correction to Enthalpy= 0.097381  
Thermal correction to Gibbs Free Energy= 0.059807  
Sum of electronic and zero-point Energies= -1888.395196  
Sum of electronic and thermal Energies= -1888.389159  
Sum of electronic and thermal Enthalpies= -1888.388215  
Sum of electronic and thermal Free Energies= -1888.425788

|    |            |             |             |
|----|------------|-------------|-------------|
| N  | 0.00000000 | 0.00000000  | 0.05353700  |
| C  | 0.00000000 | 1.16185800  | -0.63684700 |
| C  | 0.00000000 | 1.19659100  | -2.01891000 |
| C  | 0.00000000 | 0.00000000  | -2.72526300 |
| C  | 0.00000000 | -1.19659100 | -2.01891000 |
| C  | 0.00000000 | -1.16185800 | -0.63684700 |
| H  | 0.00000000 | 2.07583500  | -0.05379200 |
| H  | 0.00000000 | 2.15387100  | -2.52587600 |
| H  | 0.00000000 | 0.00000000  | -3.80962400 |
| H  | 0.00000000 | -2.15387100 | -2.52587600 |
| H  | 0.00000000 | -2.07583500 | -0.05379200 |
| Cu | 0.00000000 | 0.00000000  | 1.95913300  |

### [Cu(pyridine)]<sup>+</sup> (singlet) – ~□η

Zero-point correction= 0.089044 (Hartree/Particle)  
Thermal correction to Energy= 0.095427  
Thermal correction to Enthalpy= 0.096371  
Thermal correction to Gibbs Free Energy= 0.056933  
Sum of electronic and zero-point Energies= -1888.361501  
Sum of electronic and thermal Energies= -1888.355118  
Sum of electronic and thermal Enthalpies= -1888.354174  
Sum of electronic and thermal Free Energies= -1888.393612

|    |             |             |             |
|----|-------------|-------------|-------------|
| C  | 1.18652586  | 1.14859413  | -0.22526589 |
| N  | 1.63743791  | 0.00003605  | -0.74923653 |
| C  | 1.18656738  | -1.14855557 | -0.22530378 |
| C  | 0.27393707  | -1.21387108 | 0.84368045  |
| C  | -0.18128474 | -0.00003265 | 1.41238010  |
| C  | 0.27389578  | 1.21384185  | 0.84372351  |
| Cu | -1.03945444 | -0.00000229 | -0.48599568 |
| H  | 1.57268933  | 2.06252850  | -0.66949380 |
| H  | -0.03337152 | 2.17058607  | 1.25161722  |
| H  | -0.83451915 | -0.00005932 | 2.27914185  |
| H  | -0.03329915 | -2.17064002 | 1.25153978  |
| H  | 1.57276560  | -2.06246121 | -0.66956096 |

**[Cu(pyridine)<sub>2</sub>]<sup>+</sup> (singlet) – D<sub>2d</sub>**

|                                              |                             |
|----------------------------------------------|-----------------------------|
| Zero-point correction=                       | 0.181160 (Hartree/Particle) |
| Thermal correction to Energy=                | 0.192857                    |
| Thermal correction to Enthalpy=              | 0.193801                    |
| Thermal correction to Gibbs Free Energy=     | 0.141845                    |
| Sum of electronic and zero-point Energies=   | -2136.711822                |
| Sum of electronic and thermal Energies=      | -2136.700125                |
| Sum of electronic and thermal Enthalpies=    | -2136.699181                |
| Sum of electronic and thermal Free Energies= | -2136.751136                |

|    |             |             |             |
|----|-------------|-------------|-------------|
| C  | 0.00000000  | 1.15831405  | 2.59629569  |
| N  | 0.00000000  | 0.00000000  | 1.90198632  |
| C  | -0.00000000 | -1.15831405 | 2.59629569  |
| C  | -0.00000000 | -1.19595795 | 3.97875514  |
| C  | 0.00000000  | 0.00000000  | 4.68608146  |
| C  | 0.00000000  | 1.19595795  | 3.97875514  |
| Cu | 0.00000000  | 0.00000000  | -0.00000000 |
| H  | 0.00000000  | 2.07034172  | 2.00964069  |
| H  | 0.00000000  | 2.15318007  | 4.48595437  |
| H  | 0.00000000  | 0.00000000  | 5.77052544  |
| H  | -0.00000000 | -2.15318007 | 4.48595437  |

|   |             |             |             |
|---|-------------|-------------|-------------|
| H | -0.00000000 | -2.07034172 | 2.00964069  |
| N | 0.00000000  | 0.00000000  | -1.90198632 |
| C | 1.15831405  | -0.00000000 | -2.59629569 |
| C | 1.19595795  | -0.00000000 | -3.97875514 |
| C | 0.00000000  | 0.00000000  | -4.68608146 |
| C | -1.19595795 | 0.00000000  | -3.97875514 |
| C | -1.15831405 | 0.00000000  | -2.59629569 |
| H | -2.07034172 | 0.00000000  | -2.00964069 |
| H | -2.15318007 | 0.00000000  | -4.48595437 |
| H | 0.00000000  | 0.00000000  | -5.77052544 |
| H | 2.15318007  | -0.00000000 | -4.48595437 |
| H | 2.07034172  | -0.00000000 | -2.00964069 |

**[Cu(pyridine)<sub>3</sub>]<sup>+</sup> (singlet)\* – C<sub>1</sub>**

|                                              |                             |
|----------------------------------------------|-----------------------------|
| Zero-point correction=                       | 0.269774 (Hartree/Particle) |
| Thermal correction to Energy=                | 0.288009                    |
| Thermal correction to Enthalpy=              | 0.288954                    |
| Thermal correction to Gibbs Free Energy=     | 0.216934                    |
| Sum of electronic and zero-point Energies=   | -2384.965589                |
| Sum of electronic and thermal Energies=      | -2384.947354                |
| Sum of electronic and thermal Enthalpies=    | -2384.946410                |
| Sum of electronic and thermal Free Energies= | -2385.018429                |

|    |             |             |             |
|----|-------------|-------------|-------------|
| Cu | 0.00000000  | 0.27277900  | 0.00000000  |
| N  | -1.84122700 | 1.01385300  | -0.00709600 |
| C  | -2.74502300 | 0.58887300  | -0.91367000 |
| C  | -4.04841500 | 1.05426200  | -0.95415200 |
| C  | -4.45635400 | 1.99485900  | -0.01572600 |
| C  | -3.53630200 | 2.43486000  | 0.92791200  |
| C  | -2.24778500 | 1.92859500  | 0.89632100  |
| H  | -1.50037500 | 2.25911100  | 1.61041600  |
| H  | -3.80536100 | 3.16739400  | 1.67936400  |
| H  | -5.47090900 | 2.37747900  | -0.02053400 |
| H  | -4.72810100 | 0.68015800  | -1.71035500 |
| H  | -2.39298000 | -0.15164500 | -1.62613000 |

|   |             |             |             |
|---|-------------|-------------|-------------|
| N | -0.00023100 | -1.79553500 | 0.00000000  |
| C | 1.02726400  | -2.49232200 | -0.51839900 |
| C | 1.06541500  | -3.87728700 | -0.54137900 |
| C | -0.00067200 | -4.58540700 | 0.00000000  |
| C | -1.06653500 | -3.87694400 | 0.54140000  |
| C | -1.02794600 | -2.49199200 | 0.51840400  |
| H | -1.84398000 | -1.90289600 | 0.92836600  |
| H | -1.91914400 | -4.38553100 | 0.97535800  |
| H | -0.00084300 | -5.66988100 | 0.00000000  |
| H | 1.91786400  | -4.38614800 | -0.97533100 |
| H | 1.84348400  | -1.90348900 | -0.92836700 |
| N | 1.84152600  | 1.01347600  | 0.00709200  |
| C | 2.24826300  | 1.92814400  | -0.89632100 |
| C | 3.53687600  | 2.43416200  | -0.92790900 |
| C | 4.45684300  | 1.99397900  | 0.01572900  |
| C | 4.04872100  | 1.05345800  | 0.95415100  |
| C | 2.74524100  | 0.58831900  | 0.91366600  |
| H | 2.39305500  | -0.15213500 | 1.62612200  |
| H | 4.72833400  | 0.67922100  | 1.71035400  |
| H | 5.47147100  | 2.37640400  | 0.02054100  |
| H | 3.80607700  | 3.16664600  | -1.67935700 |
| H | 1.50091800  | 2.25880600  | -1.61041700 |

**[Cu(pyridine)<sub>4</sub>]<sup>+</sup> (singlet) – D<sub>2d</sub>**

|                                              |                             |
|----------------------------------------------|-----------------------------|
| Zero-point correction=                       | 0.360776 (Hartree/Particle) |
| Thermal correction to Energy=                | 0.384601                    |
| Thermal correction to Enthalpy=              | 0.385545                    |
| Thermal correction to Gibbs Free Energy=     | 0.304089                    |
| Sum of electronic and zero-point Energies=   | -2633.214186                |
| Sum of electronic and thermal Energies=      | -2633.190361                |
| Sum of electronic and thermal Enthalpies=    | -2633.189417                |
| Sum of electronic and thermal Free Energies= | -2633.270872                |

|    |            |            |            |
|----|------------|------------|------------|
| Cu | 0.00000000 | 0.00000000 | 0.00000000 |
| N  | 0.00000000 | 1.66087700 | 1.23924500 |



|   |             |             |             |
|---|-------------|-------------|-------------|
| C | -1.14926900 | 2.16412900  | 1.72421500  |
| C | -1.19506100 | 3.16412700  | 2.68293700  |
| C | 0.00000000  | 3.67658100  | 3.17354600  |
| C | 1.19506100  | 3.16412700  | 2.68293700  |
| C | 1.14926900  | 2.16412900  | 1.72421500  |
| H | 2.06279500  | 1.73248800  | 1.32188300  |
| H | 2.15189100  | 3.52949300  | 3.03709800  |
| H | 0.00000000  | 4.45864300  | 3.92518500  |
| H | -2.15189100 | 3.52949300  | 3.03709800  |
| H | -2.06279500 | 1.73248800  | 1.32188300  |
| N | -1.66087700 | 0.00000000  | -1.23924500 |
| C | -2.16412900 | -1.14926900 | -1.72421500 |
| C | -3.16412700 | -1.19506100 | -2.68293700 |
| C | -3.67658100 | 0.00000000  | -3.17354600 |
| C | -3.16412700 | 1.19506100  | -2.68293700 |
| C | -2.16412900 | 1.14926900  | -1.72421500 |
| H | -1.73248800 | 2.06279500  | -1.32188300 |
| H | -3.52949300 | 2.15189100  | -3.03709800 |
| H | -4.45864300 | 0.00000000  | -3.92518500 |
| H | -3.52949300 | -2.15189100 | -3.03709800 |
| H | -1.73248800 | -2.06279500 | -1.32188300 |
| N | 0.00000000  | -1.66087700 | 1.23924500  |
| C | 1.14926900  | -2.16412900 | 1.72421500  |
| C | 1.19506100  | -3.16412700 | 2.68293700  |
| C | 0.00000000  | -3.67658100 | 3.17354600  |
| C | -1.19506100 | -3.16412700 | 2.68293700  |
| C | -1.14926900 | -2.16412900 | 1.72421500  |
| H | -2.06279500 | -1.73248800 | 1.32188300  |
| H | -2.15189100 | -3.52949300 | 3.03709800  |
| H | 0.00000000  | -4.45864300 | 3.92518500  |
| H | 2.15189100  | -3.52949300 | 3.03709800  |
| H | 2.06279500  | -1.73248800 | 1.32188300  |
| N | 1.66087700  | 0.00000000  | -1.23924500 |
| C | 2.16412900  | 1.14926900  | -1.72421500 |
| C | 3.16412700  | 1.19506100  | -2.68293700 |
| C | 3.67658100  | 0.00000000  | -3.17354600 |

|   |            |             |             |
|---|------------|-------------|-------------|
| C | 3.16412700 | -1.19506100 | -2.68293700 |
| C | 2.16412900 | -1.14926900 | -1.72421500 |
| H | 1.73248800 | -2.06279500 | -1.32188300 |
| H | 3.52949300 | -2.15189100 | -3.03709800 |
| H | 4.45864300 | 0.00000000  | -3.92518500 |
| H | 3.52949300 | 2.15189100  | -3.03709800 |
| H | 1.73248800 | 2.06279500  | -1.32188300 |

### [Cu(O<sub>2</sub>)<sup>+</sup> (triplet) - C<sub>s</sub>

|                                              |                             |
|----------------------------------------------|-----------------------------|
| Zero-point correction=                       | 0.004585 (Hartree/Particle) |
| Thermal correction to Energy=                | 0.008463                    |
| Thermal correction to Enthalpy=              | 0.009407                    |
| Thermal correction to Gibbs Free Energy=     | -0.023089                   |
| Sum of electronic and zero-point Energies=   | -1790.442322                |
| Sum of electronic and thermal Energies=      | -1790.438444                |
| Sum of electronic and thermal Enthalpies=    | -1790.437500                |
| Sum of electronic and thermal Free Energies= | -1790.469997                |

1 3

|    |             |             |             |
|----|-------------|-------------|-------------|
| Cu | -0.00000000 | 0.85183323  | 0.00000000  |
| O  | 0.36742604  | -1.06000733 | -0.00000000 |
| O  | -0.36742604 | -2.02788813 | -0.00000000 |

### [Cu(pyridine)(O<sub>2</sub>)<sup>+</sup> (triplet)\* - C<sub>s</sub>

|                                              |                             |
|----------------------------------------------|-----------------------------|
| Zero-point correction=                       | 0.095528 (Hartree/Particle) |
| Thermal correction to Energy=                | 0.104968                    |
| Thermal correction to Enthalpy=              | 0.105912                    |
| Thermal correction to Gibbs Free Energy=     | 0.056943                    |
| Sum of electronic and zero-point Energies=   | -2038.773057                |
| Sum of electronic and thermal Energies=      | -2038.763617                |
| Sum of electronic and thermal Enthalpies=    | -2038.762673                |
| Sum of electronic and thermal Free Energies= | -2038.811642                |

|    |             |             |            |
|----|-------------|-------------|------------|
| C  | -0.99965700 | 2.90635100  | 0.00000000 |
| C  | 0.25807100  | 3.49794100  | 0.00000000 |
| C  | 1.38473400  | 2.68394500  | 0.00000000 |
| C  | 1.22094700  | 1.31172200  | 0.00000000 |
| N  | 0.00000000  | 0.73080100  | 0.00000000 |
| C  | -1.09269700 | 1.52744200  | 0.00000000 |
| Cu | -0.17544100 | -1.16945800 | 0.00000000 |
| O  | -0.42729400 | -3.01528800 | 0.00000000 |
| O  | 0.37746800  | -3.93726100 | 0.00000000 |
| H  | 2.07665400  | 0.64550800  | 0.00000000 |
| H  | 2.38420800  | 3.10062300  | 0.00000000 |
| H  | 0.35867800  | 4.57753500  | 0.00000000 |
| H  | -1.90499400 | 3.50047400  | 0.00000000 |
| H  | -2.05653900 | 1.03052300  | 0.00000000 |

**[Cu(pyridine)<sub>2</sub>(O<sub>2</sub>)<sup>+</sup> (triplet)\* – C<sub>1</sub>**

|                                              |                             |
|----------------------------------------------|-----------------------------|
| Zero-point correction=                       | 0.185480 (Hartree/Particle) |
| Thermal correction to Energy=                | 0.201026                    |
| Thermal correction to Enthalpy=              | 0.201970                    |
| Thermal correction to Gibbs Free Energy=     | 0.136484                    |
| Sum of electronic and zero-point Energies=   | -2287.066523                |
| Sum of electronic and thermal Energies=      | -2287.050977                |
| Sum of electronic and thermal Enthalpies=    | -2287.050032                |
| Sum of electronic and thermal Free Energies= | -2287.115518                |

|    |             |             |             |
|----|-------------|-------------|-------------|
| Cu | -0.05977500 | -0.12730800 | 0.00880900  |
| N  | -1.98022600 | -0.24412000 | 0.01969600  |
| C  | -2.75369800 | 0.73116700  | -0.50018600 |
| C  | -4.13521500 | 0.65545500  | -0.51381100 |
| C  | -4.75492400 | -0.46296900 | 0.02944700  |
| C  | -3.96479600 | -1.47134600 | 0.56784100  |
| C  | -2.58916600 | -1.32930300 | 0.54414400  |
| H  | -1.93994100 | -2.09542800 | 0.95409300  |
| H  | -4.40200000 | -2.36140300 | 1.00316700  |
| H  | -5.83597000 | -0.54757300 | 0.03374600  |

|   |             |             |             |
|---|-------------|-------------|-------------|
| H | -4.70907100 | 1.46647400  | -0.94483800 |
| H | -2.23457400 | 1.59024500  | -0.90982600 |
| N | 1.85110900  | -0.34951600 | 0.00752500  |
| C | 2.45594800  | -1.14666900 | -0.89801300 |
| C | 3.82763700  | -1.32335400 | -0.93385600 |
| C | 4.61648300  | -0.66019000 | -0.00204000 |
| C | 4.00029900  | 0.15992700  | 0.93544800  |
| C | 2.62364800  | 0.29156800  | 0.90893800  |
| H | 2.10770500  | 0.92636200  | 1.62162900  |
| H | 4.57341900  | 0.69595000  | 1.68179000  |
| H | 5.69414300  | -0.78020800 | -0.00632000 |
| H | 4.26273900  | -1.97184500 | -1.68418100 |
| H | 1.80737800  | -1.64773400 | -1.60846400 |
| O | 0.97243100  | 2.82345200  | -0.13719700 |
| O | -0.05290900 | 2.16490000  | -0.03958800 |

**[Cu(pyridine)<sub>3</sub>(O<sub>2</sub>)<sup>+</sup> (triplet) – C<sub>1</sub>**

|                                              |                             |
|----------------------------------------------|-----------------------------|
| Zero-point correction=                       | 0.275280 (Hartree/Particle) |
| Thermal correction to Energy=                | 0.296920                    |
| Thermal correction to Enthalpy=              | 0.297864                    |
| Thermal correction to Gibbs Free Energy=     | 0.216789                    |
| Sum of electronic and zero-point Energies=   | -2535.365398                |
| Sum of electronic and thermal Energies=      | -2535.343757                |
| Sum of electronic and thermal Enthalpies=    | -2535.342813                |
| Sum of electronic and thermal Free Energies= | -2535.423889                |

|    |             |             |             |
|----|-------------|-------------|-------------|
| Cu | -0.09504200 | -0.01337900 | 0.10679800  |
| N  | 1.01001700  | -1.69974400 | -0.19121000 |
| C  | 2.19583000  | -1.84854200 | 0.42054800  |
| C  | 2.97293100  | -2.98255400 | 0.27876700  |
| C  | 2.51443400  | -4.01093500 | -0.52961800 |
| C  | 1.29150500  | -3.86567400 | -1.16606300 |
| C  | 0.57264800  | -2.70188400 | -0.97047000 |
| H  | 2.51678300  | -1.02203600 | 1.04838800  |

|   |             |             |             |
|---|-------------|-------------|-------------|
| H | 3.92107200  | -3.05272100 | 0.79727400  |
| H | 0.89246200  | -4.64350200 | -1.80524200 |
| H | -0.39162000 | -2.55222900 | -1.44717800 |
| N | -2.10809100 | -0.03361200 | -0.12895300 |
| C | -2.72737500 | 0.82802900  | -0.95189800 |
| C | -4.09849900 | 0.84637900  | -1.12190500 |
| C | -4.87250000 | -0.05870100 | -0.41247900 |
| C | -4.24237100 | -0.95048200 | 0.44149800  |
| C | -2.86590900 | -0.90677900 | 0.55438400  |
| H | -2.08718100 | 1.52418600  | -1.48565300 |
| H | -4.54691500 | 1.56327000  | -1.79847800 |
| H | -4.80601600 | -1.67415400 | 1.01712000  |
| H | -2.33507100 | -1.58574400 | 1.21508400  |
| N | 0.94512200  | 1.71753400  | -0.21091300 |
| C | 0.62566700  | 2.83183700  | 0.46755900  |
| C | 1.31431000  | 4.02083500  | 0.32152400  |
| C | 2.38002200  | 4.07223300  | -0.56346200 |
| C | 2.71654700  | 2.92799300  | -1.26979300 |
| C | 1.97940000  | 1.77725700  | -1.06456600 |
| H | -0.21378800 | 2.75102500  | 1.15202900  |
| H | 1.01567100  | 4.88915500  | 0.89564200  |
| H | 3.54156300  | 2.92073000  | -1.97132300 |
| H | 2.21454000  | 0.85960300  | -1.59579400 |
| H | 3.10084800  | -4.91325000 | -0.66071900 |
| H | -5.95091700 | -0.06795100 | -0.52246800 |
| H | 2.94022300  | 4.99018700  | -0.70036800 |
| O | -0.19597400 | -0.01920800 | 2.19521200  |
| O | 0.88039600  | 0.09897000  | 2.78952700  |

**[Cu (H<sub>2</sub>O)]<sup>+</sup> (singlet) – C<sub>2v</sub>**

|                                            |                             |
|--------------------------------------------|-----------------------------|
| Zero-point correction=                     | 0.024053 (Hartree/Particle) |
| Thermal correction to Energy=              | 0.027979                    |
| Thermal correction to Enthalpy=            | 0.028924                    |
| Thermal correction to Gibbs Free Energy=   | -0.000292                   |
| Sum of electronic and zero-point Energies= | -1716.552227                |

Sum of electronic and thermal Energies= -1716.548301  
Sum of electronic and thermal Enthalpies= -1716.547356  
Sum of electronic and thermal Free Energies= -1716.576572

|    |             |             |             |
|----|-------------|-------------|-------------|
| H  | 0.00000000  | -0.77683876 | 1.98739600  |
| O  | 0.00000000  | -0.00000000 | 1.41696800  |
| H  | -0.00000000 | 0.77683876  | 1.98739600  |
| Cu | 0.00000000  | 0.00000000  | -0.52790400 |

**[Cu(pyridine)(H<sub>2</sub>O)]<sup>+</sup> (singlet) – C<sub>1</sub>**

Zero-point correction= 0.115290 (Hartree/Particle)  
Thermal correction to Energy= 0.124598  
Thermal correction to Enthalpy= 0.125543  
Thermal correction to Gibbs Free Energy= 0.079345  
Sum of electronic and zero-point Energies= -1964.876210  
Sum of electronic and thermal Energies= -1964.866901  
Sum of electronic and thermal Enthalpies= -1964.865957  
Sum of electronic and thermal Free Energies= -1964.912155

|    |             |             |             |
|----|-------------|-------------|-------------|
| Cu | -1.46111700 | -0.00396100 | -0.00001100 |
| N  | 0.43008500  | -0.00425300 | -0.00000300 |
| C  | 1.12682400  | -1.16198900 | -0.00000200 |
| C  | 2.50922700  | -1.19381100 | 0.00000400  |
| C  | 3.21217200  | 0.00487100  | 0.00000700  |
| C  | 2.50151400  | 1.19896000  | 0.00000500  |
| C  | 1.11932300  | 1.15811400  | 0.00000000  |
| H  | 0.53075500  | 2.06869300  | -0.00000100 |
| H  | 3.00554800  | 2.15746000  | 0.00000800  |
| H  | 4.29645900  | 0.00838500  | 0.00001100  |
| H  | 3.01959200  | -2.14895900 | 0.00000500  |
| H  | 0.54424900  | -2.07632000 | -0.00000400 |
| O  | -3.37675800 | 0.04482500  | 0.00002300  |
| H  | -3.91757100 | -0.13002000 | -0.77740900 |
| H  | -3.91754200 | -0.13007400 | 0.77746200  |

**[Cu(pyridine)<sub>2</sub>(H<sub>2</sub>O)]<sup>+</sup> (singlet) – C<sub>1</sub>**

Zero-point correction= 0.204779 (Hartree/Particle)  
Thermal correction to Energy= 0.220214  
Thermal correction to Enthalpy= 0.221158  
Thermal correction to Gibbs Free Energy= 0.159042  
Sum of electronic and zero-point Energies= -2213.147736  
Sum of electronic and thermal Energies= -2213.132301  
Sum of electronic and thermal Enthalpies= -2213.131356  
Sum of electronic and thermal Free Energies= -2213.193473

|    |             |             |             |
|----|-------------|-------------|-------------|
| C  | -2.51651800 | -1.16794400 | -0.70601800 |
| N  | -1.91186800 | -0.17086100 | -0.02676300 |
| C  | -2.69106200 | 0.68815100  | 0.66311100  |
| C  | -4.07047900 | 0.58109000  | 0.69781300  |
| C  | -4.68508600 | -0.44668200 | -0.00704900 |
| C  | -3.89038000 | -1.33411700 | -0.72202700 |
| Cu | 0.00000900  | 0.01269000  | -0.00017600 |
| N  | 1.91187700  | -0.17088200 | 0.02667100  |
| C  | 2.51640300  | -1.16809200 | 0.70584600  |
| C  | 3.89026400  | -1.33427000 | 0.72206700  |
| C  | 4.68509700  | -0.44670300 | 0.00739400  |
| C  | 4.07061700  | 0.58120100  | -0.69738500 |
| C  | 2.69119400  | 0.68825600  | -0.66290700 |
| H  | 2.16987800  | 1.47795300  | -1.19266900 |
| H  | 4.64814600  | 1.29606400  | -1.27077800 |
| H  | 5.76402200  | -0.55481200 | -0.00103600 |
| H  | 4.32261400  | -2.15134800 | 1.28647500  |
| H  | 1.86344800  | -1.84362100 | 1.24737500  |
| H  | -1.86365900 | -1.84337500 | -1.24778500 |
| H  | -4.32283200 | -2.15108900 | -1.28651200 |
| H  | -5.76401000 | -0.55478900 | 0.00155000  |
| H  | -4.64790500 | 1.29584700  | 1.27144100  |
| H  | -2.16965200 | 1.47775100  | 1.19292300  |
| O  | -0.00006700 | 2.45575400  | -0.00002000 |

|   |             |            |             |
|---|-------------|------------|-------------|
| H | -0.49444900 | 3.04206100 | -0.58159500 |
| H | 0.49431000  | 3.04217900 | 0.58144100  |

**[Cu(pyridine)<sub>3</sub>(H<sub>2</sub>O)]<sup>+</sup> (singlet) – C<sub>1</sub>**

|                                              |                             |
|----------------------------------------------|-----------------------------|
| Zero-point correction=                       | 0.293467 (Hartree/Particle) |
| Thermal correction to Energy=                | 0.315339                    |
| Thermal correction to Enthalpy=              | 0.316283                    |
| Thermal correction to Gibbs Free Energy=     | 0.237257                    |
| Sum of electronic and zero-point Energies=   | -2461.399220                |
| Sum of electronic and thermal Energies=      | -2461.377348                |
| Sum of electronic and thermal Enthalpies=    | -2461.376404                |
| Sum of electronic and thermal Free Energies= | -2461.455430                |

|    |             |             |             |
|----|-------------|-------------|-------------|
| H  | -0.15095900 | 0.91784300  | 3.01903000  |
| O  | 0.06616200  | 0.11137100  | 2.54128100  |
| H  | -0.18084400 | -0.60239400 | 3.13741200  |
| Cu | 0.06994600  | -0.14196400 | 0.12100500  |
| N  | -1.60646200 | -1.27186900 | 0.01786000  |
| C  | -2.72627300 | -0.90249200 | 0.66830900  |
| C  | -3.91342200 | -1.61339000 | 0.59570200  |
| C  | -3.96113800 | -2.76118800 | -0.18658600 |
| C  | -2.81287400 | -3.15199000 | -0.86459500 |
| C  | -1.66501300 | -2.38696900 | -0.73433900 |
| H  | -2.64835000 | 0.00223800  | 1.26533000  |
| H  | -4.78259800 | -1.26815000 | 1.14307400  |
| H  | -4.87494300 | -3.33961500 | -0.26593500 |
| H  | -2.79943600 | -4.04031200 | -1.48479200 |
| H  | -0.74638500 | -2.66742100 | -1.24159900 |
| N  | -0.32969300 | 1.84951000  | -0.17541200 |
| C  | 0.50346800  | 2.78471000  | 0.31673500  |
| C  | 0.30371100  | 4.14469700  | 0.14099200  |
| C  | -0.80296900 | 4.57070800  | -0.58415000 |
| C  | -1.66784300 | 3.61454700  | -1.10225600 |
| C  | -1.39734300 | 2.27423600  | -0.87419300 |
| H  | 1.36566000  | 2.41122200  | 0.86419200  |



|   |             |             |             |
|---|-------------|-------------|-------------|
| H | 1.00924600  | 4.85238500  | 0.56005200  |
| H | -0.98581100 | 5.62748500  | -0.74479500 |
| H | -2.54184900 | 3.89781700  | -1.67672200 |
| H | -2.05118400 | 1.49751400  | -1.26184200 |
| N | 1.96096900  | -0.74588600 | -0.08457800 |
| C | 2.81750600  | -0.74644200 | 0.95717900  |
| C | 4.14695200  | -1.11752900 | 0.84026500  |
| C | 4.63265800  | -1.50978300 | -0.40126400 |
| C | 3.76019900  | -1.51132600 | -1.48294200 |
| C | 2.44496800  | -1.12585600 | -1.28455600 |
| H | 2.39690100  | -0.43457700 | 1.90794900  |
| H | 4.78740300  | -1.09745000 | 1.71418200  |
| H | 5.66832000  | -1.80659800 | -0.52376400 |
| H | 4.08884100  | -1.80696000 | -2.47221200 |
| H | 1.73904600  | -1.11093800 | -2.10984800 |
